# Supplementary material for: Risk and accuracy of outpatient-identified hypoxaemia for death among suspected child pneumonia cases in rural Bangladesh: a multifacility prospective cohort study
Source: PubMed Central journal article supplement (PMC10469265; doi:10.1016/s2213-2600(23)00098-x), 2023-09
Supplement: mmc1.pdf [file mmc1.pdf]

# THE LANCET

## Respiratory Medicine

### Supplementary appendix

This appendix formed part of the original submission and has been peer reviewed. We post it as supplied by the authors.

Supplement to: McCollum ED, Ahmed S, Roy AD, et al. Risk and accuracy of outpatient-identified hypoxaemia for death among suspected child pneumonia cases in rural Bangladesh: a multifacility prospective cohort study. *Lancet Respir Med* 2023; published online April 7. [https://doi.org/10.1016/S2213-2600\(23\)00098-X](https://doi.org/10.1016/S2213-2600(23)00098-X).

# Supplemental Material – Risk and accuracy of outpatient-identified hypoxemia for death among suspected child pneumonia cases in rural Bangladesh: a multi-facility cohort study

## Corresponding author:

Dr. Eric D. McCollum, MD, MPH

Director, Johns Hopkins University Global Program in Pediatric Respiratory Sciences

Eudowood Division of Pediatric Respiratory Sciences, Johns Hopkins School of Medicine

Department of International Health, Johns Hopkins Bloomberg School of Public Health

Email: [emccoll3@jhmi.edu](mailto:emccoll3@jhmi.edu)

## Contents

### Section 1:

- ◇ Panel: Key study definitions

### Section 2: Outpatient 3 – 11 month old children and three month mortality – secondary analysis

- ◇ Supplemental Table 1: Three-month mortality of outpatient 3 – 11 month old children with suspected pneumonia in rural Bangladesh
- ◇ Supplemental Table 2: Risk of three-month mortality by SpO<sub>2</sub> measurement of outpatient 3 – 11 month old children with suspected pneumonia in rural Bangladesh

### Section 3: Outpatient 12 – 35 month old children: two-week and three-month mortality – secondary analysis

- ◇ Supplemental Table 3: Characteristics of outpatient 12 – 35 month old children with suspected pneumonia in rural Bangladesh
- ◇ Supplemental Table 4: Two-week mortality of outpatient 12 – 35 month old children with suspected pneumonia in rural Bangladesh
- ◇ Supplemental Table 5: Risk of two-week mortality by SpO<sub>2</sub> measurement of outpatient 12 – 35 month old children with suspected pneumonia in rural Bangladesh
- ◇ Supplemental Table 6: WHO IMCI accuracy for identifying mortality with and without pulse oximetry and at varying SpO<sub>2</sub> thresholds for outpatient 12 – 35 month old children in Bangladesh
- ◇ Supplemental Figure 1: 3,240 children 12 – 35 months old with suspected pneumonia and SpO<sub>2</sub> measurement
- ◇ Supplemental Table 7: Three-month mortality of outpatient 12 – 35 month old children with suspected pneumonia in rural Bangladesh
- ◇ Supplemental Table 8: Risk of three-month mortality by SpO<sub>2</sub> measurement of outpatient 12 – 35 month old children with suspected pneumonia in rural Bangladesh

### Section 4: Outpatient 3-11 month old children and two-week mortality risk model specification – primary analysis

- ◇ Model specification Summary Table (Supplemental Table 9) – Risk of two-week mortality by SpO<sub>2</sub> measurement of outpatient 3 – 11 month old children with suspected pneumonia in rural Bangladesh
- ◇ Model specification Statistical Output (Stata) – Risk of two-week mortality by SpO<sub>2</sub> measurement of outpatient 3 – 11 month old children with suspected pneumonia in rural Bangladesh
- ◇ Final model internal validation using nonparametric bootstrap estimation (Stata output)

### Section 5: Outpatient 3-11 month old children and three-month mortality risk model specification – secondary analysis

- ◇ Model specification Summary Table (Supplemental Table 10) – Risk of three-month mortality by SpO<sub>2</sub> measurement of outpatient 3 – 11 month old children with suspected pneumonia in rural Bangladesh
- ◇ Model specification Statistical Output (Stata) – Risk of three-month mortality by SpO<sub>2</sub> measurement of outpatient 3 – 11 month old children with suspected pneumonia in rural Bangladesh

*(note: model specification for 12-35 month old children was not conducted due to sparse mortality observations at two-weeks (n=3) and three-months (n=5))*

## **Section 6: Exploratory post-hoc sensitivity analyses**

- ◇ **Supplemental Figure 2: Decision curve analysis**
- ◇ **Supplemental Table 11 – EMPIC eligibility criteria applied to outpatient 3 – 11 month olds in rural Bangladesh**
- ◇ **Supplemental Table 12 – Comparison of outpatient 3 – 11 month olds with difficulty breathing reported by caregivers and unreported by caregivers in rural Bangladesh**
- ◇ **Supplemental Table 13. Exclusion of all patients 3 – 11 month olds referred to outpatient clinics**
- ◇ **Exploratory post-hoc model specification – Risk of two-week mortality by SpO<sub>2</sub> measurement of outpatient 3 – 11 month old children with suspected pneumonia in rural Bangladesh**
  - **Supplemental Table 14. Two-week mortality of outpatient 3 – 11 month old children with suspected pneumonia in rural Bangladesh – exploratory analysis of additional variables**
  - **Supplemental Table 15. Summary Table**
  - **Model specification of exploratory variables Statistical Output (Stata) – Risk of two-week mortality by SpO<sub>2</sub> measurement of outpatient 3 – 11 month old children with suspected pneumonia in rural Bangladesh**
- ◇ **Exploratory post-hoc sensitivity analysis – Weekly community surveillance for acute respiratory illness**
  - **Supplemental Table 16. Hypoxemia strata**
  - **Supplemental Table 17. Mortality**
  - **Primary Model controlling for weekly surveillance (Stata output)**
  - **Model selection accounting for weekly surveillance (Stata output)**
  - **Subgroup analysis of Primary Model dropping 508 weekly surveillance cases (Stata output)**
- ◇ **Exploratory post-hoc sensitivity analysis – One month mortality**
  - **Statistical output**
- ◇ **Exploratory post-hoc sensitivity analysis – Verbal autopsy data**
  - **Supplemental Table 18. IMCI symptom VA results by probable LRI and SpO<sub>2</sub> strata among 3-11 month olds – 2 week mortality**
  - **Statistical Output (Stata). Risk of two-week LRI mortality by IMCI symptom VA results among 3-11 month olds**
  - **Supplemental Table 19. IMCI symptom VA results by probable LRI and SpO<sub>2</sub> strata among 3-11 month olds – 1 month mortality**
  - **Statistical Output (Stata). Risk of 1 month LRI mortality by IMCI symptom VA results among 3-11 month olds**
  - **Supplemental Table 20. IMCI symptom VA results by probable LRI and SpO<sub>2</sub> strata among 3-11 month olds – 3 month mortality**
  - **Statistical Output (Stata). Risk of 3 month LRI mortality by IMCI symptom VA results among 3-11 month olds**
  - **Supplemental Table 21. CCVA results by probable LRI and SpO<sub>2</sub> strata among 3-11 month olds – 2 week mortality**
  - **Statistical Output (Stata). Risk of two-week LRI mortality by CCVA results among 3-11 month olds**
  - **Supplemental Table 22. CCVA results by probable LRI and SpO<sub>2</sub> strata among 3-11 month olds – 1 month mortality**
  - **Statistical Output (Stata). Risk of 1 month LRI mortality by CCVA results among 3-11 month olds**
  - **Supplemental Table 23. CCVA results by probable LRI and SpO<sub>2</sub> strata among 3-11 month olds – 3 month mortality**
  - **Statistical Output (Stata). Risk of 3 month LRI mortality by CCVA results among 3-11 month olds**
- ◇ **Exploratory post-hoc sensitivity analysis – Pneumococcal conjugate vaccine (PCV) data**
  - **Supplemental Table 24. PCV status and death by two weeks**
  - **Primary model controlling for participant PCV status (statistical output)**
  - **Subgroup analysis of participants with a *known* PCV status (drops 1,014 participants and 13/24 mortality events) (statistical output)**
- ◇ **Exploratory post-hoc sensitivity analysis – aRR by SpO<sub>2</sub> unit (1%) using the final model at two week mortality**

- **Statistical output**
- **Supplemental Figure 3. Probability of mortality by SpO<sub>2</sub> 1% units between 90-100%**

## Section 1: Key study definitions

### Panel. Key study definitions

| <b>Eligibility criteria</b>                |                                                                                                                                                                                                                                                                                                                                                                        |
|--------------------------------------------|------------------------------------------------------------------------------------------------------------------------------------------------------------------------------------------------------------------------------------------------------------------------------------------------------------------------------------------------------------------------|
| <b>Inclusion criteria</b>                  | <ul style="list-style-type: none"> <li>• 3-35 months of age <i>and</i></li> <li>• Residing in the surveillance area <i>and</i></li> <li>• Observed difficult breathing <i>and</i></li> <li>• Written informed consent</li> </ul>                                                                                                                                       |
| <b>Observed difficult breathing</b>        | <ul style="list-style-type: none"> <li>• fast breathing for age <i>or</i></li> <li>• chest indrawing <i>or</i></li> <li>• head nodding or tracheal tugging <i>or</i></li> <li>• persistent nasal flaring <i>or</i></li> <li>• cyanosis <i>or</i></li> <li>• stridor <i>or</i></li> <li>• grunting <i>or</i></li> <li>• adventitial lung auscultation sounds</li> </ul> |
| <b>Fast breathing</b>                      | <ul style="list-style-type: none"> <li>• respiratory rate 50 breaths/minute for 3–11 month olds</li> <li>• respiratory rate 40 breaths/minute for 12–35 month olds</li> </ul>                                                                                                                                                                                          |
| <b>WHO IMCI general danger sign</b>        | <ul style="list-style-type: none"> <li>• stridor at rest <i>or</i></li> <li>• observed or history of convulsions within prior 24 hours <i>or</i></li> <li>• not feeding or drinking <i>or</i></li> <li>• vomiting everything <i>or</i></li> <li>• lethargy or coma</li> </ul>                                                                                          |
| <b>Severe acute malnutrition</b>           | <ul style="list-style-type: none"> <li>• Weight-for-age z score &lt; -3 <i>or</i></li> <li>• bilateral pedal edema <i>or</i></li> <li>• Mid-upper arm circumference &lt;11.5cm (children &gt;6 months old)</li> </ul>                                                                                                                                                  |
| <b>Quality SpO<sub>2</sub> measurement</b> | <ul style="list-style-type: none"> <li>• Stable SpO<sub>2</sub> value for ≥3 seconds <i>and</i></li> <li>• ≥2 green bars on the device Quality Index scale <i>and</i></li> <li>• ≥2 green bars on the device Perfusion Index scale <i>and</i></li> <li>• &lt;5 minutes measurement time</li> </ul>                                                                     |
| <b>WHO IMCI severe pneumonia</b>           | <ul style="list-style-type: none"> <li>• Observed difficult breathing <i>and</i></li> <li>• ≥1 WHO-defined general danger sign <i>or</i></li> <li>• Severe acute malnutrition</li> </ul>                                                                                                                                                                               |
| <b>WHO IMCI non-severe pneumonia</b>       | <ul style="list-style-type: none"> <li>• Observed difficult breathing <i>and</i></li> <li>• Fast breathing <i>or</i></li> <li>• Chest indrawing <i>and</i></li> <li>• Absence of any WHO-defined general danger signs <i>and</i></li> <li>• Absence of severe acute malnutrition</li> </ul>                                                                            |

WHO indicates World Health Organization; SpO<sub>2</sub>, peripheral oxyhemoglobin saturation; IMCI, Integrated Management of Childhood Illness

**Section 2: Outpatient 3 – 11 month old children and three month mortality – secondary analysis**

**Supplemental Table 1. Three-month mortality of outpatient 3 – 11 month old children with suspected pneumonia in rural Bangladesh**

| Characteristic                                      |                       | Alive, N=3,801 | Dead, N=47 | p value |
|-----------------------------------------------------|-----------------------|----------------|------------|---------|
| <b>Age, in months</b>                               | Median (IQR)          | 6 (4, 9)       | 5 (4, 7)   | 0.016   |
| <b>Sex, n (%)</b>                                   | Females               | 1,569 (41.2)   | 26 (55.3)  | 0.052   |
|                                                     | Males                 | 2,232 (58.7)   | 21 (44.6)  |         |
| <b>Clinic, n (%)</b>                                | Beanibazar            | 1,132 (29.7)   | 18 (38.3)  | 0.108   |
|                                                     | Zakiganj              | 1,036 (27.2)   | 16 (34.0)  |         |
|                                                     | Kanaighat             | 1,633 (42.9)   | 13 (27.6)  |         |
| <b>Severe acute malnutrition<sup>1</sup>, n (%)</b> |                       | 393 (7.7)      | 14 (29.7)  | <0.001  |
| <b>General danger signs<sup>2</sup>, n (%)</b>      |                       | 8 (0.2)        | 0 (0)      | 0.753   |
| <b>SpO<sub>2</sub> in room air, n (%)</b>           | 94% – 100%            | 3,344 (87.9)   | 29 (61.7)  | <0.001  |
|                                                     | 90% – 93%             | 297 (7.8)      | 9 (19.5)   |         |
|                                                     | < 90%, n (%)          | 98 (2.5)       | 4 (8.5)    |         |
|                                                     | Failed measurement, n | 62 (1.6)       | 5 (10.6)   |         |
| <b>Hospitalization, n (%)</b>                       |                       | 344 (9.0)      | 14 (29.7)  | <0.001  |
| <b>Oxygen, n (%)</b>                                |                       | 147 (3.8)      | 10 (21.2)  | <0.001  |

IQR indicates interquartile range; SpO<sub>2</sub>, peripheral arterial oxyhemoglobin saturation.

<sup>1</sup>Weight-for-age z score < -3 and/or a mid-upper arm circumference <11.5cm (for children >6 months old)

<sup>2</sup>Stridor at rest, convulsions, not feeding or drinking, vomiting everything, lethargy or coma

**Supplemental Table 2. Risk of three-month mortality by SpO<sub>2</sub> measurement of outpatient 3 – 11-month-old children with suspected pneumonia in rural Bangladesh**

| Characteristic                                                          |                                         | Risk ratio <sup>1</sup> | 95% CI    | p value | Adjusted risk ratio <sup>1</sup> | 95% CI    | p value |
|-------------------------------------------------------------------------|-----------------------------------------|-------------------------|-----------|---------|----------------------------------|-----------|---------|
| <b>WHO IMCI and no SpO<sub>2</sub>, N=3,848</b>                         | WHO IMCI referral criteria <sup>2</sup> | 4.7                     | 2.5, 8.8  | <0.001  | –                                | –         | –       |
| <b>WHO IMCI and SpO<sub>2</sub> (continuous), N=3,781</b>               | WHO IMCI referral criteria <sup>2</sup> | 4.7                     | 2.5, 8.8  | <0.001  | 4.1                              | 2.1, 8.2  | <0.001  |
|                                                                         | SpO <sub>2</sub>                        | 0.9                     | 0.8, 0.9  | <0.001  | 0.9                              | 0.9, 0.9  | <0.001  |
| <b>WHO IMCI and SpO<sub>2</sub> (strata), N=3,848</b>                   | WHO IMCI referral criteria <sup>2</sup> | 4.7                     | 2.5, 8.8  | <0.001  | 4.1                              | 2.2, 7.7  | <0.001  |
|                                                                         | 90% – 93%                               | 3.4                     | 1.6, 7.1  | 0.001   | 3.1                              | 1.5, 6.4  | 0.002   |
|                                                                         | < 90%                                   | 4.5                     | 1.6, 12.7 | 0.004   | 4.1                              | 1.4, 11.9 | 0.009   |
|                                                                         | Failed measurement                      | 8.6                     | 3.4, 21.7 | <0.001  | 7.5                              | 3.0, 18.6 | <0.001  |
| <b>SpO<sub>2</sub> &lt;90% or failed measurement threshold, N=3,848</b> | WHO IMCI referral criteria <sup>2</sup> | 4.7                     | 2.5, 8.8  | <0.001  | 4.4                              | 2.2, 9.4  | <0.001  |
|                                                                         | < 90% or failed measurement             | 5.1                     | 2.5, 10.4 | <0.001  | 4.5                              | 2.2, 9.5  | <0.001  |
| <b>SpO<sub>2</sub> &lt;94% or failed measurement threshold, N=3,848</b> | WHO IMCI referral criteria <sup>2</sup> | 4.7                     | 2.5, 8.8  | <0.001  | 4.2                              | 2.2, 7.8  | <0.001  |
|                                                                         | < 94% or failed measurement             | 4.4                     | 2.4, 7.8  | <0.001  | 3.9                              | 2.2, 7.1  | <0.001  |

CI indicates confidence interval; SpO<sub>2</sub>, peripheral oxyhemoglobin saturation; CI, confidence interval.

<sup>1</sup>Risk ratio estimated by poisson regression with robust variance estimation

<sup>2</sup>WHO IMCI referral criteria, which includes any of: stridor at rest, convulsions, not feeding or drinking, vomiting everything, lethargy or coma, or severe acute malnutrition (weight-for-age z score < -3 and/or a mid-upper arm circumference <11.5cm (for children >6 months old))

**Section 3: Outpatient 12 – 35 month old children: two-week and three-month mortality – secondary analysis**

**Supplemental Table 3. Characteristics of outpatient 12 – 35 month old children with suspected pneumonia in rural Bangladesh**

| Characteristic                             |                            | No pneumonia, N=392 | Non-severe pneumonia, N=2,406 | Severe pneumonia, N=442 | Total, N=3,240      |
|--------------------------------------------|----------------------------|---------------------|-------------------------------|-------------------------|---------------------|
| Age, in months                             | Median (IQR)               | 20 (15,26)          | 20 (15,26)                    | 22 (16,27)              | 20 (15,26)          |
| Sex, n (%)                                 | Females                    | 175 (44.6)          | 1,060 (44.0)                  | 183 (41.4)              | 1,418 (43.70)       |
| Clinic, n (%)                              | Beanibazar                 | 240 (61.2)          | 775 (32.20)                   | 86 (19.4)               | 1,101 (33.9)        |
|                                            | Zakiganj                   | 76 (19.3)           | 573 (23.8)                    | 141 (31.9)              | 790 (24.3)          |
|                                            | Kanaighat                  | 76 (19.3)           | 1,058 (43.9)                  | 215 (48.6)              | 1,349 (41.6)        |
| Weight, in kg                              | Mean (SD)                  | 9.7 (1.5)           | 9.5 (1.4)                     | 7.4 (1.0)               | 9.2 (1.6)           |
| Weight-for-age z score                     | >-2.0                      | 302 (77.0)          | 1,677 (69.7)                  | 9 (2.0)                 | 1,988 (61.3)        |
|                                            | <-2.0 to >-3.0             | 90 (22.9)           | 729 (30.3)                    | 9 (2.0)                 | 828 (25.5)          |
|                                            | <-3.0                      | –                   | –                             | 424 (95.9)              | 424 (13.0)          |
| Mid-upper arm circumference <11.5cm, n (%) |                            | –                   | –                             | 16 (3.6)                | 16 (0.4)            |
| Severe acute malnutrition, n (%)           |                            | –                   | –                             | 429 (97.0)              | 429 (13.2)          |
| Fever >101 °F, n (%)                       |                            | 61 (15.5)           | 668 (27.7)                    | 117 (26.4)              | 846 (26.1)          |
| Fast breathing for age, n (%)              |                            | –                   | 2,325 (96.6)                  | 395 (89.3)              | 2,720 (83.9)        |
| Lower chest wall indrawing, n (%)          |                            | –                   | 711 (29.5)                    | 140 (31.6)              | 851 (26.2)          |
| Respiratory distress, n (%)                |                            | 4 (1.0)             | 193 (8.0)                     | 43 (9.7)                | 240 (7.4)           |
|                                            | Head nodding, n (%)        | –                   | 101 (4.2)                     | 27 (6.1)                | 128 (3.9)           |
|                                            | Nasal flaring, n (%)       | 4 (1.0)             | 115 (4.7)                     | 26 (5.8)                | 145 (4.4)           |
|                                            | Wheeze, n (%)              | 5 (1.2)             | 37 (1.5)                      | 10 (2.2)                | 52 (1.6)            |
|                                            | Grunting, n (%)            | 1 (0.2)             | 6 (0.2)                       | 3 (0.6)                 | 10 (0.3)            |
| WHO IMCI danger signs, n (%)               |                            | –                   | –                             | 14 (3.1)                | 14 (0.4)            |
|                                            | Stridor, n (%)             | –                   | –                             | –                       | –                   |
|                                            | Convulsion, n (%)          | –                   | –                             | 13 (2.9)                | 13 (0.4)            |
|                                            | Not feeding, n (%)         | –                   | –                             | –                       | –                   |
|                                            | Vomiting everything, n (%) | –                   | –                             | –                       | –                   |
| Lethargy, n (%)                            |                            | –                   | –                             | 2 (0.4)                 | 2 (0)               |
| SpO <sub>2</sub> in room air <sup>1</sup>  | Median (IQR)               | 97 (96, 99) (n=387) | 97 (96, 99) (n=2,358)         | 97 (96, 98) (n=425)     | 97 (96, 99) n=3,170 |
|                                            | 94% – 100%, n (%)          | 363 (92.6)          | 2,198 (91.3)                  | 390 (88.2)              | 2,951 (91.0)        |
|                                            | 90% – 93%, n (%)           | 22 (5.6)            | 133 (5.5)                     | 27 (6.1)                | 182 (5.6)           |
|                                            | < 90%, n (%)               | 2 (0.5)             | 27 (1.1)                      | 8 (1.8)                 | 37 (1.1)            |
|                                            | Failed measurement, n (%)  | 5 (1.2)             | 48 (2.0)                      | 17 (3.8)                | 70 (2.1)            |
| Hospitalization, n (%)                     |                            | 6 (1.5)             | 116 (4.8)                     | 37 (8.3)                | 159 (4.9)           |
| Oxygen, n (%)                              |                            | 3 (0.7)             | 43 (1.7)                      | 15 (3.3)                | 61 (1.8)            |
| Mortality, n (%)                           | Two weeks                  | –                   | 2 (0.1)                       | 1 (0.2)                 | 3 (0.1)             |
|                                            | Three months               | –                   | 3 (0.1)                       | 2 (0.4)                 | 5 (0.1)             |

WHO indicates World Health Organization; IMCI, Integrated Management of Childhood Illness; IQR, interquartile range; SD, standard deviation; SpO<sub>2</sub>, peripheral arterial oxyhemoglobin saturation. <sup>1</sup>387 measurements for no pneumonia category; 2,358 measurements for non-severe pneumonia category; 425 measurements for severe pneumonia category; 3,170 measurements total.



**Supplemental Table 4. Two-week mortality of outpatient 12 – 35 month old children with suspected pneumonia in rural Bangladesh**

| Characteristic                                 |                       | Alive, N=3,237 | Dead, N=3   | p value |
|------------------------------------------------|-----------------------|----------------|-------------|---------|
| Age, in months                                 | Median (IQR)          | 20 (15, 26)    | 13 (12, 17) | 0.049   |
| Sex, n (%)                                     | Females               | 1,417 (43.7)   | 1 (33.3)    | 0.716   |
|                                                | Males                 | 1,820 (56.2)   | 2 (66.6)    |         |
| Clinic, n (%)                                  | Beanibazar            | 1,101 (34.0)   | 0 (-)       | 0.010   |
|                                                | Zakiganj              | 787 (24.3)     | 3 (100.0)   |         |
|                                                | Kanaighat             | 1,349 (41.6)   | 0 (-)       |         |
| Severe acute malnutrition <sup>1</sup> , n (%) |                       | 428 (13.2)     | 1 (33.3)    | 0.304   |
| WHO IMCI danger signs <sup>2</sup> , n (%)     |                       | 14 (0.4)       | 0 (-)       | 0.909   |
| SpO <sub>2</sub> in room air, n (%)            | 94% – 100%            | 2,950 (91.1)   | 1 (33.3)    | <0.001  |
|                                                | 90% – 93%             | 181 (5.5)      | 1 (33.3)    |         |
|                                                | < 90%, n (%)          | 37 (1.1)       | 0 (-)       |         |
|                                                | Failed measurement, n | 69 (2.1)       | 1 (33.3)    |         |
| Hospitalization, n (%)                         |                       | 157 (4.8)      | 2 (66.6)    | <0.001  |
| Oxygen, n (%)                                  |                       | 59 (1.8)       | 2 (66.6)    | <0.001  |

IQR indicates interquartile range; SpO<sub>2</sub>, peripheral arterial oxyhemoglobin saturation.

<sup>1</sup>Weight-for-age z score < -3 and/or a MUAC <11.5cm (for children >6 months old)

<sup>2</sup>Stridor at rest, convulsions, not feeding or drinking, vomiting everything, lethargy or coma

**Supplemental Table 5. Risk of two-week mortality by SpO<sub>2</sub> measurement of outpatient 12 – 35 month old children with suspected pneumonia in rural Bangladesh**

| Characteristic                                                 |                                         | Risk ratio <sup>1</sup> | 95% CI     | p value |
|----------------------------------------------------------------|-----------------------------------------|-------------------------|------------|---------|
| WHO IMCI and no SpO <sub>2</sub> , N=3,240                     | WHO IMCI referral criteria <sup>2</sup> | 3.1                     | 0.2, 34.8  | 0.346   |
| SpO <sub>2</sub> (continuous), N=3,170                         | SpO <sub>2</sub>                        | 0.9                     | 0.8, 1.0   | 0.165   |
| WHO IMCI and SpO <sub>2</sub> (strata), N=3,240                | 90% – 93%                               | 16.2                    | 1.0, 258.2 | 0.049   |
|                                                                | < 90%                                   | –                       | –          | –       |
|                                                                | Failed measurement                      | 42.1                    | 2.6, 667.4 | 0.008   |
| SpO <sub>2</sub> <90% or failed measurement threshold, N=3,240 | < 90% or failed measurement             | 14.6                    | 1.3, 160.2 | 0.028   |
| SpO <sub>2</sub> <94% or failed measurement threshold, N=3,240 | < 94% or failed measurement             | 20.4                    | 1.8, 224.6 | 0.014   |

CI indicates confidence interval; SpO<sub>2</sub>, peripheral oxyhemoglobin saturation; CI, confidence interval.

<sup>1</sup>Risk ratio estimated by poisson regression with robust variance estimation

<sup>2</sup>WHO IMCI referral criteria, which includes any of: stridor at rest, convulsions, not feeding or drinking, vomiting everything, lethargy or coma, or severe acute malnutrition (weight-for-age z score < -3 and/or a mid-upper arm circumference <11.5cm (for children >6 months old))

**Supplemental Table 6. WHO IMCI accuracy for identifying two-week mortality with and without pulse oximetry and at varying SpO<sub>2</sub> thresholds for outpatient 12 – 35 month old children in Bangladesh**

| Model                                                   | Referral eligibility prevalence | Sensitivity (95% CI) | Specificity (95% CI) | PPV (95% CI)      | NPV (95% CI)         | LR Positive (95% CI) | LR Negative (95% CI) | AUC             | Diagnostic OR (95% CI) | LRT <sup>1</sup> |
|---------------------------------------------------------|---------------------------------|----------------------|----------------------|-------------------|----------------------|----------------------|----------------------|-----------------|------------------------|------------------|
| <b>WHO IMCI without pulse oximetry</b>                  | 13.6%                           | 33.3% (0.8%, 90.6%)  | 86.4% (85.1%, 87.5%) | 0.2% (0%, 1.2%)   | 99.9% (99.7%, 99.9%) | 2.4 (0.4, 12.2)      | 0.7 (0.3, 1.7)       | 0.59 (0.2, 0.9) | 3.1 (0.2, 35.0)        | Ref              |
| <b>WHO IMCI with SpO<sub>2</sub> &lt;90%</b>            | 14.5%                           | 33.3% (0.8%, 90.6%)  | 85.5% (84.2%, 86.7%) | 0.2% (0%, 1.1%)   | 99.9% (99.7%, 100%)  | 2.3 (0.4, 11.4)      | 0.7 (0.3, 1.7)       | 0.59 (0.2, 0.9) | 2.9 (0.2, 32.5)        | 0.1              |
| <b>WHO IMCI with SpO<sub>2</sub> &lt;90% or failure</b> | 16.1%                           | 33.3% (0.8%, 90.6%)  | 83.8% (82.5%, 85.1%) | 0.1% (0%, 1.0%)   | 99.9% (99.7%, 100%)  | 2.0 (0.4, 10.2)      | 0.7 (0.3, 1.7)       | 0.58 (0.2, 0.9) | 2.5 (0.2, 28.6)        | 2.8              |
| <b>WHO IMCI with SpO<sub>2</sub> &lt;94%</b>            | 19.3%                           | 66.7% (9.4%, 99.2%)  | 81.6% (80.2%, 82.9%) | 0.3% (0%, 1.2%)   | 100% (99.8%, 100%)   | 3.6 (1.6, 8.1)       | 0.4 (0, 2.0)         | 0.74 (0.4, 1.0) | 2.8 (1.2, 6.6)         | 0.1              |
| <b>WHO IMCI with SpO<sub>2</sub> &lt;94% or failure</b> | 20.9%                           | 66.6% (9.4%, 99.1%)  | 79.0% (77.6%, 80.4%) | 2.0% (1.1%, 3.3%) | 99.7% (99.4%, 99.8%) | 3.1 (1.4, 7.1)       | 0.4 (0, 2.0)         | 0.72 (0.4, 1.0) | 7.5 (0.6, 83.5)        | 5.8              |

WHO indicates World Health Organization; IMCI, Integrated Management of Childhood Illnesses; SpO<sub>2</sub>, peripheral oxyhemoglobin saturation; CI, confidence interval; PPV, positive predictive value; NPV, negative predictive value; OR, odds ratio.

<sup>1</sup>Chi-square test statistic for the likelihood-ratio test comparing the reduced model (IMCI without pulse oximetry) and the full model (IMCI with pulse oximetry (SpO<sub>2</sub> threshold specified by table row)).

P values for LRT comparisons as follows: IMCI with SpO<sub>2</sub> <90%= 0.7797; SpO<sub>2</sub> <90% or failure=0.0892; IMCI with SpO<sub>2</sub> <94%=0.1814; IMCI with SpO<sub>2</sub> <94% or failure=0.0160.

**Supplemental Figure 1: 3,240 children 12 – 35 months old with suspected pneumonia and SpO<sub>2</sub> measurement**

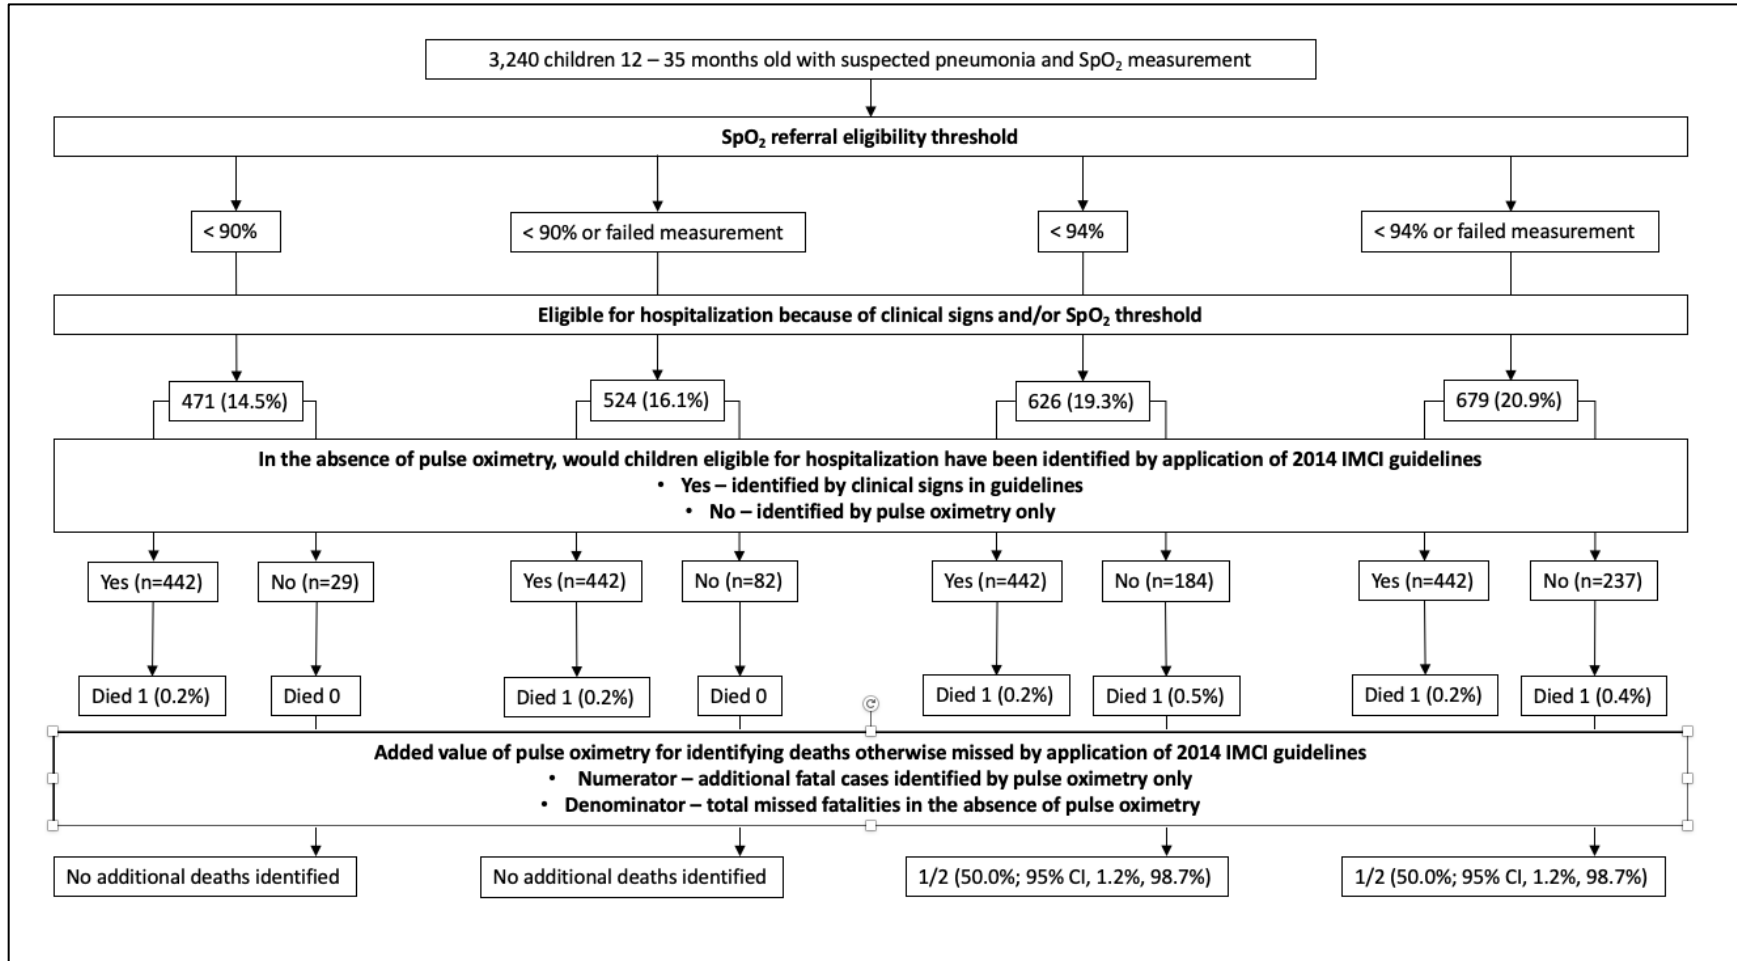

**Supplemental Table 7. Three-month mortality of outpatient 12 – 35 month old children with suspected pneumonia in rural Bangladesh**

| Characteristic                                 |                       | Alive, N=3,235 | Dead, N=5   | p value |
|------------------------------------------------|-----------------------|----------------|-------------|---------|
| Age, in months                                 | Median (IQR)          | 20 (15, 26)    | 16 (13, 17) | 0.134   |
| Sex, n (%)                                     | Females               | 1,416 (43.7)   | 2 (40.0)    | 0.865   |
|                                                | Males                 | 1,819 (56.2)   | 3 (60.0)    |         |
| Clinic, n (%)                                  | Beanibazar            | 1,100 (34.0)   | 1 (20.0)    | 0.178   |
|                                                | Zakiganj              | 787 (24.3)     | 3 (60.0)    |         |
|                                                | Kanaighat             | 1,348 (41.6)   | 1 (20.0)    |         |
| Severe acute malnutrition <sup>1</sup> , n (%) |                       | 427 (13.2)     | 2 (40.0)    | 0.077   |
| WHO IMCI danger signs <sup>2</sup> , n (%)     |                       | 14 (0.4)       | 0 (-)       | 0.883   |
| SpO <sub>2</sub> in room air, n (%)            | 94% – 100%            | 2,949 (91.1)   | 2 (40.0)    | <0.001  |
|                                                | 90% – 93%             | 181 (5.6)      | 1 (20.0)    |         |
|                                                | < 90%, n (%)          | 36 (1.1)       | 1 (20.0)    |         |
|                                                | Failed measurement, n | 69 (2.1)       | 1 (20.0)    |         |
| Hospitalization, n (%)                         |                       | 156 (4.8)      | 2 (60.0)    | <0.001  |
| Oxygen, n (%)                                  |                       | 59 (1.8)       | 2 (40.0)    | <0.001  |

IQR indicates interquartile range; SpO<sub>2</sub>, peripheral arterial oxyhemoglobin saturation.

<sup>1</sup>Weight-for-age z score < -3 and/or a MUAC <11.5cm (for children >6 months old)

<sup>2</sup>Stridor at rest, convulsions, not feeding or drinking, vomiting everything, lethargy or coma

**Supplemental Table 8: Risk of three-month mortality by SpO<sub>2</sub> measurement of outpatient 12 – 35 month old children with suspected pneumonia in rural Bangladesh**

| Characteristic                                                    |                                         | Risk ratio <sup>1</sup> | 95% CI     | p value |
|-------------------------------------------------------------------|-----------------------------------------|-------------------------|------------|---------|
| WHO IMCI and no SpO <sub>2</sub> ,<br>N=3,240                     | WHO IMCI referral criteria <sup>2</sup> | 4.2                     | 0.7, 25.1  | 0.114   |
| WHO IMCI and SpO <sub>2</sub><br>(continuous) , N=3,170           | SpO <sub>2</sub>                        |                         |            |         |
| WHO IMCI and SpO <sub>2</sub> (strata),<br>N=3,240                | 90% – 93%                               | 8.1                     | 0.7, 89.0  | 0.087   |
|                                                                   | < 90%                                   | 39.8                    | 3.6, 430.3 | 0.002   |
|                                                                   | Failed measurement                      | 21.0                    | 1.9, 229.8 | 0.012   |
| SpO <sub>2</sub> <90% or failed<br>measurement threshold, N=3,240 | < 90% or failed measurement             | 19.5                    | 3.2, 115.6 | 0.001   |
| SpO <sub>2</sub> <94% or failed<br>measurement threshold, N=3,240 | < 94% or failed measurement             | 15.3                    | 2.5, 91.3  | 0.003   |

CI indicates confidence interval; SpO<sub>2</sub>, peripheral oxyhemoglobin saturation; CI, confidence interval.

<sup>1</sup>Risk ratio estimated by poisson regression with robust variance estimation

<sup>2</sup>WHO IMCI referral criteria, which includes any of: stridor at rest, convulsions, not feeding or drinking, vomiting everything, lethargy or coma, or severe acute malnutrition (weight-for-age z score < -3 and/or a mid-upper arm circumference <11.5cm (for children >6 months old))

#### **Section 4: Outpatient 3-11 month old children and two-week mortality risk model specification – primary analysis**

**Overall approach:** Due to the fact that mortality events at two-weeks were modest in number (n=24) for our primary analysis of 3 – 11 month olds (and also for secondary analyses) the model specification approach sought to optimize both model fit and parsimony. Our research question of interest was whether a low oxygen saturation was independently associated with an elevated mortality risk when controlling for the currently recommended Integrated Management of Childhood Illnesses (IMCI) criteria (i.e., World Health Organization (WHO) IMCI danger signs and/or severe acute malnutrition). That is, does oxygen saturation have added value in predicting fatalities when employed in an outpatient context in Bangladesh?

We therefore employed a forward selection approach where variables with a p value <0.05 in bivariable analysis (see Table 2) of the association between mortality and exposure variables were added stepwise to the base model of hypoxemia and IMCI referral criteria. We then compared the Bayesian Information Criterion (BIC) score of the ‘nested model’ (i.e., saved model) and the ‘non-nested model’ (i.e., current model). As described by Williams in 2022 (see <https://www3.nd.edu/~rwilliam/xsoc73994/L05.pdf>) and Jorgensen et al (see <https://methods.sagepub.com/foundations/goodness-of-fit-measures>) BIC evaluates model fit while also comparing the nested and non-nested models. Per Williams and Jorgensen BIC favors the model that is most likely to have produced the observed data, while also having penalties for models with variables that do not lead to an improved fit. Overall, this results in BIC favoring more parsimonious but suitable models.

To facilitate BIC model comparison we utilized a scale proposed by Raftery (<https://www3.nd.edu/~rwilliam/xsoc73994/L05.pdf>) that categorizes the absolute magnitude of BIC difference with a qualitative description of the strength of difference. We used Raftery’s scale to facilitate decision-making on model selection.

Raftery scale:

| Absolute difference | Evidence    |
|---------------------|-------------|
| 0-2                 | Weak        |
| 2-6                 | Positive    |
| 6-10                | Strong      |
| >10                 | Very strong |

Whenever evidence of the absolute difference in BIC values between models was ‘weak’ we also considered the p value of the added term. In this scenario of ‘weak’ BIC evidence (i.e., neither model favored) we then evaluated the added term’s p value. If the added term’s p value was <0.05 then we added the variable to the model. If the added term’s p value was >0.05 then we did not add the variable to the model and retained the nested (saved) model. A similar approach was utilized for secondary analyses of mortality risk as mortality events remained modest in number.

**Model specification Summary Table – Risk of two-week mortality by SpO<sub>2</sub> measurement of outpatient 3 – 11-month-old children with suspected pneumonia in rural Bangladesh – primary analysis**

| <b>Model A: exposure variables</b>                                                                                                                                                    | <b>Model B: exposure variables</b>                                                         | <b>BIC – Model A</b> | <b>BIC – Model B</b> | <b>BIC – absolute difference</b> | <b>Evidence per Raftery scale</b> | <b>Favored Model</b> |
|---------------------------------------------------------------------------------------------------------------------------------------------------------------------------------------|--------------------------------------------------------------------------------------------|----------------------|----------------------|----------------------------------|-----------------------------------|----------------------|
| <ul style="list-style-type: none"> <li>• WHO IMCI referral criteria</li> <li>• SpO<sub>2</sub> &lt;90%</li> <li>• SpO<sub>2</sub> 90-93%</li> <li>• Failed SpO<sub>2</sub></li> </ul> | Model A plus: <ul style="list-style-type: none"> <li>• clinic (as fixed effect)</li> </ul> | -31444.231           | -31424.047           | 20.1                             | Very strong                       | Model A              |
|                                                                                                                                                                                       | Model A plus: hospital (as interaction term)                                               | -31391.621           | -31444.231           | 52.6                             | Very strong                       | Model A              |
|                                                                                                                                                                                       | Model A plus: oxygen (as interaction term)                                                 | -31393.801           | -31444.231           | 50.4                             | Very strong                       | Model A              |
|                                                                                                                                                                                       | Model A plus: Severe acute malnutrition (as interaction term)                              | -31385.667           | -31444.231           | 58.5                             | Very strong                       | Model A              |
|                                                                                                                                                                                       | Model A plus: WHO IMCI referral criteria (as interaction term)                             | -31385.593           | -31444.231           | 58.6                             | Very strong                       | Model A              |





- **Clinic as random effect:**

Mixed-effects Poisson regression  
Group variable: clinic

Number of obs = 3,848  
Number of groups = 3

Obs per group:  
min = 1,052  
avg = 1,282.7  
max = 1,646

Integration points = 7  
Log likelihood = -132.11966

Wald chi2(4) = 32.03  
Prob > chi2 = 0.0000

| death2w    | IRR      | Std. Err. | z      | P> z  | [95% Conf. Interval] |          |
|------------|----------|-----------|--------|-------|----------------------|----------|
| hypoxia    |          |           |        |       |                      |          |
| 90-93      | 4.064415 | 2.234161  | 2.55   | 0.011 | 1.383893             | 11.93696 |
| <90        | 9.839038 | 5.779364  | 3.89   | 0.000 | 3.111461             | 31.11293 |
| failed     | 10.85599 | 7.145203  | 3.62   | 0.000 | 2.988305             | 39.43791 |
| IMCI_refer | 3.089452 | 1.466933  | 2.38   | 0.018 | 1.218187             | 7.835178 |
| _cons      | .0030839 | .0010222  | -17.44 | 0.000 | .0016105             | .0059053 |

Note: \_cons estimates baseline incidence rate (conditional on zero random effects).

| Random-effects Parameters | Estimate | Std. Err. | [95% Conf. Interval] |          |
|---------------------------|----------|-----------|----------------------|----------|
| clinic: Identity          |          |           |                      |          |
| sd(_cons)                 | .2256012 | .3461003  | .0111556             | 4.562368 |

LR test vs. Poisson model: chibar2(01) = 0.17      Prob >= chibar2 = 0.3396

As Prob >= chibar2 = 0.3396 the model with clinic as random effect is not favored. Model A retained.

- **Hospital as interaction term:**

**Model A:**

Poisson regression

Number of obs = 3,848  
Wald chi2(4) = 45.28  
Prob > chi2 = 0.0000  
Pseudo R2 = 0.0936

Log pseudolikelihood = -132.20513

| death2w    | IRR      | Robust Std. Err. | z      | P> z  | [95% Conf. Interval] |          |
|------------|----------|------------------|--------|-------|----------------------|----------|
| IMCI_refer |          |                  |        |       |                      |          |
| yes        | 3.088078 | 1.488237         | 2.34   | 0.019 | 1.200794             | 7.941595 |
| hypoxia    |          |                  |        |       |                      |          |
| 90-93      | 4.297255 | 2.224147         | 2.82   | 0.005 | 1.55823              | 11.85088 |
| <90        | 10.25691 | 6.015159         | 3.97   | 0.000 | 3.249602             | 32.37451 |
| failed     | 11.39268 | 7.505195         | 3.69   | 0.000 | 3.1324               | 41.43571 |
| _cons      | .0030693 | .0009125         | -19.46 | 0.000 | .0017139             | .0054966 |

Note: \_cons estimates baseline incidence rate.

**Model B:**

Poisson regression

Number of obs = 3,848  
Wald chi2(7) = .  
Prob > chi2 = .  
Pseudo R2 = 0.1113

Log pseudolikelihood = -129.61626

| death2w | IRR | Robust Std. Err. | z | P> z | [95% Conf. Interval] |  |
|---------|-----|------------------|---|------|----------------------|--|
| hypoxia |     |                  |   |      |                      |  |

|                     |          |          |        |       |          |          |
|---------------------|----------|----------|--------|-------|----------|----------|
| 90-93               | 3.956257 | 2.557308 | 2.13   | 0.033 | 1.114478 | 14.04422 |
| <90                 | 10.71148 | 8.328808 | 3.05   | 0.002 | 2.333405 | 49.17098 |
| failed              | 6.97e-07 | 2.24e-07 | -44.07 | 0.000 | 3.71e-07 | 1.31e-06 |
| IMCI_refer          | 2.733921 | 1.41045  | 1.95   | 0.051 | .9945916 | 7.514967 |
| hypoxia#hosp_admit  |          |          |        |       |          |          |
| 94-100#Hospitalized | 2.712538 | 2.174594 | 1.24   | 0.213 | .5636149 | 13.05477 |
| 90-93#Hospitalized  | 1.853218 | 1.711559 | 0.67   | 0.504 | .3032427 | 11.32564 |
| <90#Hospitalized    | 1.177236 | 1.167856 | 0.16   | 0.869 | .1684396 | 8.227779 |
| failed#Hospitalized | 3.30e+07 | 1.94e+07 | 29.43  | 0.000 | 1.04e+07 | 1.04e+08 |
| _cons               | .0028118 | .0008777 | -18.82 | 0.000 | .0015251 | .0051842 |

Note: \_cons estimates baseline incidence rate.

Measures of Fit for poisson of death2w

|        | Model B    | Model A    | Difference |
|--------|------------|------------|------------|
| Model: | poisson    | poisson    |            |
| N:     | 3848       | 3848       | 0          |
| BIC:   | -31391.621 | -31444.231 | 52.609     |

Difference of 52.609 in BIC provides very strong support for Model A.

- Oxygen as interaction term:**

**Model A:**

|                                   |               |   |        |
|-----------------------------------|---------------|---|--------|
| Poisson regression                | Number of obs | = | 3,848  |
|                                   | Wald chi2(4)  | = | 45.28  |
|                                   | Prob > chi2   | = | 0.0000 |
| Log pseudolikelihood = -132.20513 | Pseudo R2     | = | 0.0936 |

| death2w    | IRR      | Robust Std. Err. | z      | P> z  | [95% Conf. Interval] |
|------------|----------|------------------|--------|-------|----------------------|
| IMCI_refer |          |                  |        |       |                      |
| yes        | 3.088078 | 1.488237         | 2.34   | 0.019 | 1.200794 7.941595    |
| hypoxia    |          |                  |        |       |                      |
| 90-93      | 4.297255 | 2.224147         | 2.82   | 0.005 | 1.55823 11.85088     |
| <90        | 10.25691 | 6.015159         | 3.97   | 0.000 | 3.249602 32.37451    |
| failed     | 11.39268 | 7.505195         | 3.69   | 0.000 | 3.1324 41.43571      |
| _cons      | .0030693 | .0009125         | -19.46 | 0.000 | .0017139 .0054966    |

Note: \_cons estimates baseline incidence rate.

**Model B:**

|                                   |               |   |        |
|-----------------------------------|---------------|---|--------|
| Poisson regression                | Number of obs | = | 3,848  |
|                                   | Wald chi2(8)  | = | 61.53  |
|                                   | Prob > chi2   | = | 0.0000 |
| Log pseudolikelihood = -128.52644 | Pseudo R2     | = | 0.1188 |

| death2w                 | IRR      | Robust Std. Err. | z    | P> z  | [95% Conf. Interval] |
|-------------------------|----------|------------------|------|-------|----------------------|
| hypoxia                 |          |                  |      |       |                      |
| 90-93                   | 4.672748 | 2.723364         | 2.65 | 0.008 | 1.490996 14.64429    |
| <90                     | 7.614756 | 5.973938         | 2.59 | 0.010 | 1.636328 35.43575    |
| failed                  | 6.911972 | 7.263007         | 1.84 | 0.066 | .8813958 54.20421    |
| IMCI_refer              | 2.835139 | 1.404959         | 2.10 | 0.035 | 1.073395 7.488399    |
| hypoxia#oxygen_treat1   |          |                  |      |       |                      |
| 94-100#oxygen treatment | 7.487596 | 5.954273         | 2.53 | 0.011 | 1.575619 35.58226    |
| 90-93#oxygen treatment  | 1.613031 | 1.731597         | 0.45 | 0.656 | .1967314 13.22549    |
| <90#oxygen treatment    | 3.831333 | 3.786484         | 1.36 | 0.174 | .5522205 26.58198    |
| failed#oxygen treatment | 3.692888 | 4.504832         | 1.07 | 0.284 | .3380753 40.33842    |

```

      _cons | .0026705 .0008379 -18.89 0.000 .0014438 .0049393
-----

```

Note: \_cons estimates baseline incidence rate.

Measures of Fit for poisson of death2w

|        | <u>Model B</u> | <u>Model A</u> | <u>Difference</u> |
|--------|----------------|----------------|-------------------|
| Model: | poisson        | poisson        |                   |
| N:     | 3848           | 3848           | 0                 |
| BIC:   | -31393.801     | -31444.231     | 50.430            |

**Difference of 50.430 in BIC provides very strong support for Model A.**

- **Severe acute malnutrition as interaction term**

**Model A:**

Poisson regression

|               |   |        |
|---------------|---|--------|
| Number of obs | = | 3,848  |
| Wald chi2(4)  | = | 45.28  |
| Prob > chi2   | = | 0.0000 |
| Pseudo R2     | = | 0.0936 |

Log pseudolikelihood = -132.20513

| death2w    | IRR      | Robust Std. Err. | z      | P> z  | [95% Conf. Interval] |          |
|------------|----------|------------------|--------|-------|----------------------|----------|
| IMCI_refer |          |                  |        |       |                      |          |
| yes        | 3.088078 | 1.488237         | 2.34   | 0.019 | 1.200794             | 7.941595 |
| hypoxia    |          |                  |        |       |                      |          |
| 90-93      | 4.297255 | 2.224147         | 2.82   | 0.005 | 1.55823              | 11.85088 |
| <90        | 10.25691 | 6.015159         | 3.97   | 0.000 | 3.249602             | 32.37451 |
| failed     | 11.39268 | 7.505195         | 3.69   | 0.000 | 3.1324               | 41.43571 |
| _cons      | .0030693 | .0009125         | -19.46 | 0.000 | .0017139             | .0054966 |

Note: \_cons estimates baseline incidence rate.

**Model B:**

Poisson regression

|               |   |         |
|---------------|---|---------|
| Number of obs | = | 3,848   |
| Wald chi2(7)  | = | 2987.25 |
| Prob > chi2   | = | 0.0000  |
| Pseudo R2     | = | 0.1192  |

Log pseudolikelihood = -128.46604

| death2w          | IRR      | Robust Std. Err. | z      | P> z  | [95% Conf. Interval] |          |
|------------------|----------|------------------|--------|-------|----------------------|----------|
| hypoxia          |          |                  |        |       |                      |          |
| 90-93            | 2.562591 | 1.996971         | 1.21   | 0.227 | .5563606             | 11.80326 |
| <90              | 15.26281 | 9.028405         | 4.61   | 0.000 | 4.787664             | 48.65701 |
| failed           | 17.95996 | 11.7362          | 4.42   | 0.000 | 4.989708             | 64.64508 |
| wazrefer         |          |                  |        |       |                      |          |
| SAM              | 4.200377 | 2.786909         | 2.16   | 0.031 | 1.144259             | 15.41886 |
| hypoxia#wazrefer |          |                  |        |       |                      |          |
| 90-93#SAM        | 2.765048 | 3.080908         | 0.91   | 0.361 | .3113623             | 24.55497 |
| <90#SAM          | 5.93e-09 | 5.20e-09         | -21.58 | 0.000 | 1.06e-09             | 3.31e-08 |
| failed#SAM       | 5.04e-09 | 4.69e-09         | -20.51 | 0.000 | 8.12e-10             | 3.13e-08 |
| _cons            | .0028799 | .0009587         | -17.57 | 0.000 | .0014997             | .0055303 |

Note: \_cons estimates baseline incidence rate.

Measures of Fit for poisson of death2w

|        | <u>Model B</u> | <u>Model A</u> | <u>Difference</u> |
|--------|----------------|----------------|-------------------|
| Model: | poisson        | poisson        |                   |
| N:     | 3848           | 3848           | 0                 |
| BIC:   | -31385.667     | -31444.231     | 58.564            |

**Difference of 58.564 in BIC provides very strong support for Model A**



◇ Final model internal validation using nonparametric bootstrap estimation (Stata output)

bootstrap, reps (100): poisson death2w i.IMCI\_refer i.hypoxia, vce(robust) irr  
 (running poisson on estimation sample)

Bootstrap replications (100)

```

-----+----- 1 -----+----- 2 -----+----- 3 -----+----- 4 -----+----- 5
..... 50
..... 100
  
```

```

Poisson regression                Number of obs   =    3,848
                                Replications     =     100
                                Wald chi2(2)       =    28.22
                                Prob > chi2       =    0.0000
Log pseudolikelihood = -133.45167  Pseudo R2      =    0.0850
  
```

| death2w                | Observed<br>IRR | Bootstrap<br>Std. Err. | z      | P> z  | Normal-based<br>[95% Conf. Interval] |          |
|------------------------|-----------------|------------------------|--------|-------|--------------------------------------|----------|
| IMCI_refer<br>yes      | 3.128901        | 1.532008               | 2.33   | 0.020 | 1.198441                             | 8.168963 |
| hypoxia<br><94 or fail | 6.597115        | 2.941184               | 4.23   | 0.000 | 2.753365                             | 15.80681 |
| _cons                  | .0030611        | .0010239               | -17.31 | 0.000 | .0015892                             | .0058965 |

Note: \_cons estimates baseline incidence rate.

**Section 5: Outpatient 3-11 month old children and three-month mortality risk model specification – secondary analysis**

**Model specification Summary Table – Risk of *three-month* mortality by SpO<sub>2</sub> measurement of outpatient 3 – 11 month old children with suspected pneumonia in rural Bangladesh**

| Model A: exposure variables                                                                                                                                                           | Model B: exposure variables                                                                | BIC – Model A | BIC – Model B | BIC – absolute difference | Evidence per Raftery scale | Favored Model |
|---------------------------------------------------------------------------------------------------------------------------------------------------------------------------------------|--------------------------------------------------------------------------------------------|---------------|---------------|---------------------------|----------------------------|---------------|
| <ul style="list-style-type: none"> <li>• WHO IMCI referral criteria</li> <li>• SpO<sub>2</sub> &lt;90%</li> <li>• SpO<sub>2</sub> 90-93%</li> <li>• Failed SpO<sub>2</sub></li> </ul> | <ul style="list-style-type: none"> <li>• Model A plus: clinic (as fixed effect)</li> </ul> | -31138.405    | -31115.271    | 23.1                      | Very strong                | Model A       |
|                                                                                                                                                                                       | Model A plus: hospital (as interaction term)                                               | -31138.405    | -31075.272    | 63.1                      | Very strong                | Model A       |
|                                                                                                                                                                                       | Model A plus: oxygen (as interaction term)                                                 | -31138.405    | -31078.613    | 59.7                      | Very strong                | Model A       |
|                                                                                                                                                                                       | Model A plus: Severe acute malnutrition (as interaction term)                              | -31138.405    | -31075.541    | 62.8                      | Very strong                | Model A       |
|                                                                                                                                                                                       | Model A plus: WHO IMCI referral criteria (as interaction term)                             | -31138.405    | -31075.541    | 62.8                      | Very strong                | Model A       |





Integration points = 7  
 Log likelihood = -234.6181  
 Wald chi2(4) = 51.00  
 Prob > chi2 = 0.0000

| death3m    | IRR      | Std. Err. | z      | P> z  | [95% Conf. Interval] |          |
|------------|----------|-----------|--------|-------|----------------------|----------|
| hypoxia    |          |           |        |       |                      |          |
| 90-93      | 3.116741 | 1.192995  | 2.97   | 0.003 | 1.471927             | 6.599562 |
| <90        | 4.114381 | 2.198526  | 2.65   | 0.008 | 1.443655             | 11.72588 |
| failed     | 7.538975 | 3.665533  | 4.15   | 0.000 | 2.907025             | 19.55131 |
| IMCI_refer | 4.17394  | 1.340478  | 4.45   | 0.000 | 2.224229             | 7.832727 |
| _cons      | .00694   | .00141    | -24.46 | 0.000 | .0046603             | .0103347 |

Note: \_cons estimates baseline incidence rate (conditional on zero random effects).

| Random-effects Parameters | Estimate | Std. Err. | [95% Conf. Interval] |   |
|---------------------------|----------|-----------|----------------------|---|
| clinic: Identity          |          |           |                      |   |
| sd(_cons)                 | 2.03e-09 | .3071851  | 0                    | . |

LR test vs. Poisson model: chibar2(01) = 0.00      Prob >= chibar2 = 1.0000

As Prob >= chibar2 = 1.0000 the model with clinic as random effect is not favored. **Model A** retained.

• **Hospital as interaction term:**

**Model A:**

Poisson regression      Number of obs = 3,837  
 Wald chi2(3) = 30.80  
 Prob > chi2 = 0.0000  
 Log pseudolikelihood = -242.48427      Pseudo R2 = 0.0450

| death3m | IRR      | Robust Std. Err. | z      | P> z  | [95% Conf. Interval] |          |
|---------|----------|------------------|--------|-------|----------------------|----------|
| hypoxia |          |                  |        |       |                      |          |
| 90-93   | 3.421933 | 1.289732         | 3.26   | 0.001 | 1.634754             | 7.162932 |
| <90     | 4.547667 | 2.382444         | 2.89   | 0.004 | 1.628767             | 12.69751 |
| failed  | 8.654143 | 4.052849         | 4.61   | 0.000 | 3.456171             | 21.6697  |
| _cons   | .0086233 | .0015946         | -25.71 | 0.000 | .0060016             | .01239   |

Note: \_cons estimates baseline incidence rate.

Measures of Fit for poisson of death3m

**Model B:**

Poisson regression      Number of obs = 3,837  
 Wald chi2(8) = 71.50  
 Prob > chi2 = 0.0000  
 Log pseudolikelihood = -232.78855      Pseudo R2 = 0.0832

| death3m             | IRR      | Robust Std. Err. | z    | P> z  | [95% Conf. Interval] |          |
|---------------------|----------|------------------|------|-------|----------------------|----------|
| hypoxia             |          |                  |      |       |                      |          |
| 90-93               | 2.610541 | 1.253465         | 2.00 | 0.046 | 1.018642             | 6.690205 |
| <90                 | 4.159782 | 3.07086          | 1.93 | 0.053 | .9787941             | 17.67868 |
| failed              | 3.842992 | 3.617086         | 1.43 | 0.153 | .6074422             | 24.31274 |
| IMCI_refer          |          |                  |      |       |                      |          |
| yes                 | 3.797708 | 1.260521         | 4.02 | 0.000 | 1.981499             | 7.278623 |
| hypoxia#hosp_admit  |          |                  |      |       |                      |          |
| 94-100#Hospitalized | 2.036664 | 1.113455         | 1.30 | 0.193 | .6975304             | 5.946695 |
| 90-93#Hospitalized  | 2.053398 | 1.35302          | 1.09 | 0.275 | .5644186             | 7.470416 |

|                     |          |          |        |       |          |          |
|---------------------|----------|----------|--------|-------|----------|----------|
| <90#Hospitalized    | 1.159271 | 1.158979 | 0.15   | 0.882 | .1633795 | 8.225686 |
| failed#Hospitalized | 2.985105 | 3.139161 | 1.04   | 0.298 | .3800398 | 23.44716 |
| _cons               | .0066056 | .0013647 | -24.30 | 0.000 | .0044061 | .0099029 |

Note: \_cons estimates baseline incidence rate.

Measures of Fit for poisson of death3m

|        | <u>Model B</u> | <u>Model A</u> | <u>Difference</u> |
|--------|----------------|----------------|-------------------|
| Model: | poisson        | poisson        |                   |
| N:     | 3837           | 3837           | 0                 |
| BIC:   | -31075.272     | -31138.405     | 63.133            |

Difference of 63.133 in BIC provides very strong support for Model A.

• **Oxygen as interaction term:**

Model A:

|                                   |               |   |        |
|-----------------------------------|---------------|---|--------|
| Poisson regression                | Number of obs | = | 3,837  |
|                                   | Wald chi2(3)  | = | 30.80  |
|                                   | Prob > chi2   | = | 0.0000 |
| Log pseudolikelihood = -242.48427 | Pseudo R2     | = | 0.0450 |

| death3m | IRR      | Robust Std. Err. | z      | P> z  | [95% Conf. Interval] |
|---------|----------|------------------|--------|-------|----------------------|
| hypoxia |          |                  |        |       |                      |
| 90-93   | 3.421933 | 1.289732         | 3.26   | 0.001 | 1.634754 7.162932    |
| <90     | 4.547667 | 2.382444         | 2.89   | 0.004 | 1.628767 12.69751    |
| failed  | 8.654143 | 4.052849         | 4.61   | 0.000 | 3.456171 21.6697     |
| _cons   | .0086233 | .0015946         | -25.71 | 0.000 | .0060016 .01239      |

Note: \_cons estimates baseline incidence rate.

Measures of Fit for poisson of death3m

Model B:

|                                   |               |   |        |
|-----------------------------------|---------------|---|--------|
| Poisson regression                | Number of obs | = | 3,837  |
|                                   | Wald chi2(8)  | = | 79.38  |
|                                   | Prob > chi2   | = | 0.0000 |
| Log pseudolikelihood = -231.11796 | Pseudo R2     | = | 0.0898 |

| death3m                 | IRR      | Robust Std. Err. | z      | P> z  | [95% Conf. Interval] |
|-------------------------|----------|------------------|--------|-------|----------------------|
| hypoxia                 |          |                  |        |       |                      |
| 90-93                   | 3.087967 | 1.285479         | 2.71   | 0.007 | 1.365617 6.982589    |
| <90                     | 2.818841 | 2.090287         | 1.40   | 0.162 | .6589755 12.0579     |
| failed                  | 5.16432  | 3.608703         | 2.35   | 0.019 | 1.312847 20.31479    |
| IMCI_refer              |          |                  |        |       |                      |
| yes                     | 3.909904 | 1.287935         | 4.14   | 0.000 | 2.050112 7.456836    |
| hypoxia#oxygen_treat1   |          |                  |        |       |                      |
| 94-100#oxygen treatment | 4.085228 | 2.560228         | 2.25   | 0.025 | 1.196093 13.953      |
| 90-93#oxygen treatment  | 1.708854 | 1.333272         | 0.69   | 0.492 | .3703268 7.885417    |
| <90#oxygen treatment    | 3.921632 | 3.915643         | 1.37   | 0.171 | .5540707 27.75674    |
| failed#oxygen treatment | 2.65533  | 2.293471         | 1.13   | 0.258 | .4885576 14.43183    |
| _cons                   | .0065034 | .0013177         | -24.85 | 0.000 | .0043718 .0096742    |

Note: \_cons estimates baseline incidence rate.

Measures of Fit for poisson of death3m

|        | <u>Model B</u> | <u>Model A</u> | <u>Difference</u> |
|--------|----------------|----------------|-------------------|
| Model: | poisson        | poisson        |                   |

N: 3837 3837 0  
 BIC: -31078.613 -31138.405 59.792

Difference of 59.792 in BIC provides very strong support for Model A.

• Severe acute malnutrition as interaction term

**Model A:**

Poisson regression Number of obs = 3,837  
 Wald chi2(3) = 30.80  
 Prob > chi2 = 0.0000  
 Pseudo R2 = 0.0450  
 Log pseudolikelihood = -242.48427

| death3m | IRR      | Robust Std. Err. | z      | P> z  | [95% Conf. Interval] |          |
|---------|----------|------------------|--------|-------|----------------------|----------|
| hypoxia |          |                  |        |       |                      |          |
| 90-93   | 3.421933 | 1.289732         | 3.26   | 0.001 | 1.634754             | 7.162932 |
| <90     | 4.547667 | 2.382444         | 2.89   | 0.004 | 1.628767             | 12.69751 |
| failed  | 8.654143 | 4.052849         | 4.61   | 0.000 | 3.456171             | 21.6697  |
| _cons   | .0086233 | .0015946         | -25.71 | 0.000 | .0060016             | .01239   |

Note: \_cons estimates baseline incidence rate.

Measures of Fit for poisson of death3m

**Model B:**

Poisson regression Number of obs = 3,837  
 Wald chi2(7) = 3784.10  
 Prob > chi2 = 0.0000  
 Pseudo R2 = 0.0837  
 Log pseudolikelihood = -232.65386

| death3m            | IRR      | Robust Std. Err. | z      | P> z  | [95% Conf. Interval] |          |
|--------------------|----------|------------------|--------|-------|----------------------|----------|
| hypoxia            |          |                  |        |       |                      |          |
| 90-93              | 2.738977 | 1.352003         | 2.04   | 0.041 | 1.04093              | 7.207012 |
| <90                | 6.573545 | 3.517065         | 3.52   | 0.000 | 2.303449             | 18.75948 |
| failed             | 7.650213 | 4.612302         | 3.37   | 0.001 | 2.346851             | 24.938   |
| IMCI_refer         |          |                  |        |       |                      |          |
| yes                | 4.604039 | 1.88962          | 3.72   | 0.000 | 2.059602             | 10.29188 |
| hypoxia#IMCI_refer |          |                  |        |       |                      |          |
| 90-93#yes          | 1.340438 | 1.026362         | 0.38   | 0.702 | .2988744             | 6.011801 |
| <90#yes            | 2.88e-10 | 2.01e-10         | -31.36 | 0.000 | 7.29e-11             | 1.14e-09 |
| failed#yes         | .9331607 | .8722026         | -0.07  | 0.941 | .1494029             | 5.828459 |
| _cons              | .0067611 | .0014706         | -22.97 | 0.000 | .0044144             | .0103552 |

Note: \_cons estimates baseline incidence rate.

Measures of Fit for poisson of death3m

|        | <u>Model B</u> | <u>Model A</u> | <u>Difference</u> |
|--------|----------------|----------------|-------------------|
| Model: | poisson        | poisson        |                   |
| N:     | 3837           | 3837           | 0                 |
| BIC:   | -31075.541     | -31138.405     | 62.864            |

Difference of 13.349 in BIC' provides very strong support for saved model.

Difference of 62.864 in BIC provides very strong support for Model A.



**Section 6: Exploratory post-hoc sensitivity analyses**

◇ **Supplemental Figure 2: Decision curve analysis**

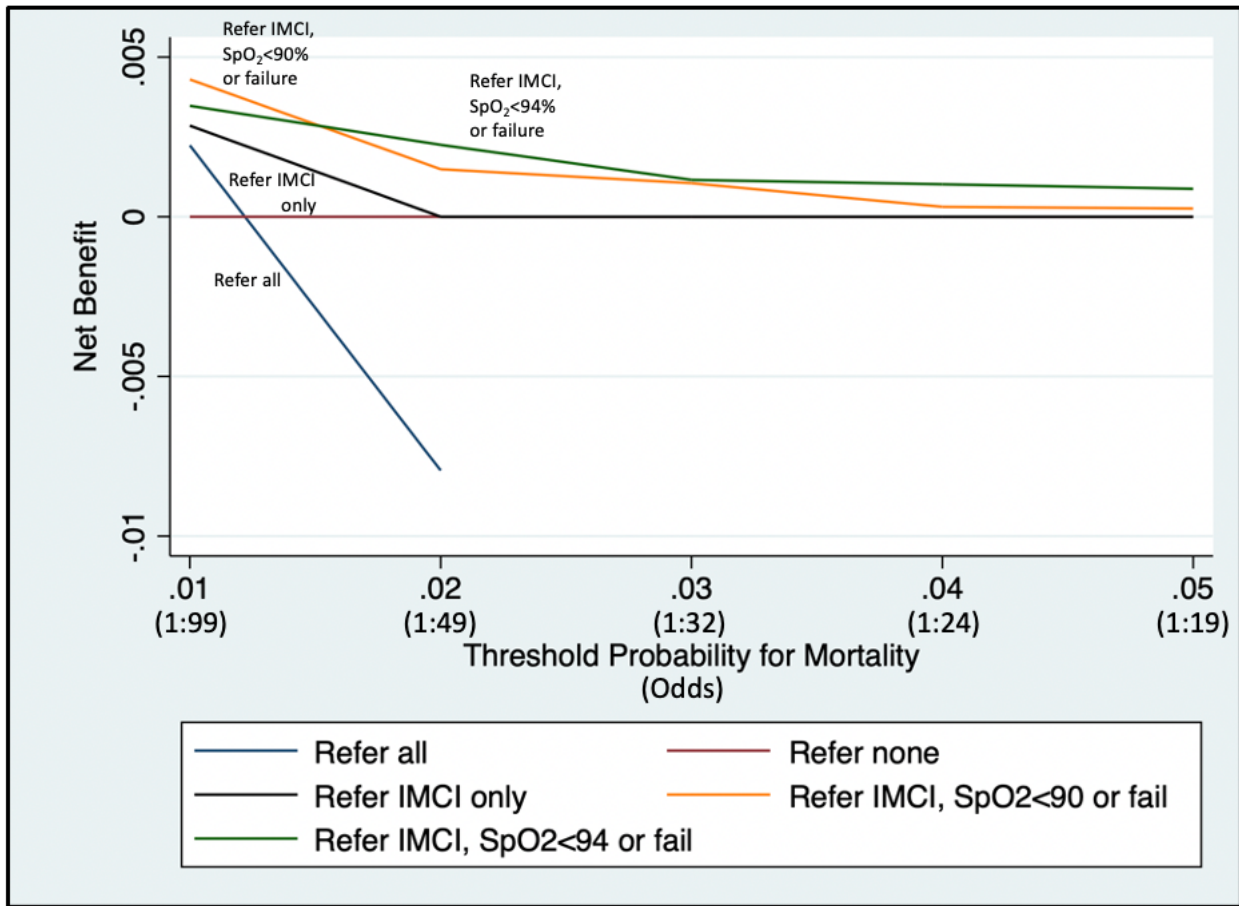

At all threshold probabilities for mortality an approach incorporating pulse oximetry (yellow or green lines) has an approximately 2-3x higher net benefit (identifying deaths amongst all referrals) than use of IMCI alone (black line). Above a threshold probability of 1.5%, an approach using a SpO<sub>2</sub> <94% threshold or failure (green line) has a roughly 2x higher net benefit than an approach using a <90% threshold or failure for referral (yellow line). In other words, an approach using IMCI, SpO<sub>2</sub> <94%, or failed measurement for referral is the favored referral approach when missing a death event would be valued as 65.6 times worse (or lower) than not referring a patient. **This decision curve analysis overall favors the primary model.**

◇ Supplemental Table 11. Exploratory post-hoc analysis: EMPIC eligibility criteria applied to outpatient 3 – 11 month olds in rural Bangladesh

a) Mortality at two weeks

|       | EMPIC<br>criteria | Total           |
|-------|-------------------|-----------------|
| alive | 1,044<br>99.52    | 1,044<br>99.52  |
| dead  | 5<br>0.48         | 5<br>0.48       |
| Total | 1,049<br>100.00   | 1,049<br>100.00 |

◇ Supplemental Table 12. Exploratory post-hoc analysis: Comparison of outpatient 3 – 11 month olds with difficult breathing reported by caregivers and unreported by caregivers in rural Bangladesh

| Difficult breathing                                       | Mortality at two weeks |                   | Total           |
|-----------------------------------------------------------|------------------------|-------------------|-----------------|
|                                                           | alive                  | dead              |                 |
| Caregiver reported                                        | 3,609<br>99.48         | 19<br><b>0.52</b> | 3,628<br>100.00 |
| Not reported by caregiver but observed by study physician | 215<br>97.73           | 5<br><b>2.27</b>  | 220<br>100.00   |
| Total                                                     | 3,824<br>99.38         | 24<br>0.62        | 3,848<br>100.00 |

Pearson chi2(1) = 10.2373 Pr = 0.001

◇ **Supplemental Table 13. Exploratory post-hoc analysis: Exclusion of all patients 3 – 11 month olds referred to outpatient clinics**

| refer        | Freq.        | Percent       | Cum.   |
|--------------|--------------|---------------|--------|
| not referred | 3,812        | 99.06         | 99.06  |
| referred     | 36           | 0.94          | 100.00 |
| <b>Total</b> | <b>3,848</b> | <b>100.00</b> |        |

| Characteristic<br>N=3,812     |                           | Risk ratio <sup>1</sup> | 95% CI    | p value | Adjusted risk<br>ratio <sup>2</sup> | 95% CI    | p value |
|-------------------------------|---------------------------|-------------------------|-----------|---------|-------------------------------------|-----------|---------|
| <b>SpO<sub>2</sub> strata</b> | <b>94% – 100%</b>         | Ref                     |           |         | Ref                                 |           |         |
|                               | <b>90% – 93%</b>          | 4.0                     | 1.2, 12.5 | 0.017   | 3.7                                 | 1.2, 11.1 | 0.020   |
|                               | <b>&lt; 90%</b>           | 12.3                    | 3.9, 38.0 | <0.001  | 11.4                                | 3.5, 36.7 | <0.001  |
|                               | <b>Failed measurement</b> | 17.2                    | 4.9, 60.1 | <0.001  | 14.9                                | 3.9, 56.2 | <0.001  |

CI indicates confidence interval; SpO<sub>2</sub>, peripheral oxyhemoglobin saturation; CI, confidence interval.

<sup>1</sup>Risk ratio estimated by poisson models with robust variance estimation

<sup>2</sup>Model adjusted for WHO IMCI referral criteria, which includes any of: stridor at rest, convulsions, not feeding or drinking, vomiting everything, lethargy or coma, or severe acute malnutrition (weight-for-age z score < -3 and/or a mid-upper arm circumference <11.5cm (for children >6 months old))

◇ **Exploratory post-hoc model specification – Risk of two-week mortality by SpO<sub>2</sub> measurement of outpatient 3 – 11 month old children with suspected pneumonia in rural Bangladesh**

**Additional variables examined in post-hoc analyses:**

- Age in months (continuous)
- Sex (binary)
- Duration of illness (in days)
- Distance from clinic (access to care)
- PCV (pneumococcal conjugate vaccine) status
- Maternal age in years (continuous)
- Wealth quintile (socioeconomic status)
- Cooking source (indoor air pollution)
- Water source
- Type of toilet (sanitation)

**The following variables were not available in our dataset:**

- Prior hospitalization
- Chronic medical conditions
- Birth weight
- Gestational age
- Anemia (hemoglobin levels)

**Supplemental Table 14. Two-week mortality of outpatient 3 – 11 month old children with suspected pneumonia in rural Bangladesh – exploratory analysis of additional variables**

| Characteristic                               |                 | Alive,<br>N=3,824 | Dead,<br>N=24    | p value |
|----------------------------------------------|-----------------|-------------------|------------------|---------|
| <b>Illness duration, in days<sup>1</sup></b> | Median (IQR)    | 3 (3,5) (n=3,755) | 3 (3, 5) (n=23)  | 0.9918  |
| <b>Distance from clinic, km</b>              | Median (IQR)    | 8.9 (4.4, 13.9)   | 10.6 (7.0, 16.5) | 0.2078  |
| <b>PCV status, n (%)</b>                     | Zero doses      | 189 (4.9%)        | 1 (4.1%)         | 0.008   |
|                                              | ≥1 dose         | 2,634 (68.8%)     | 10 (41.6%)       |         |
|                                              | Missing         | 1,001 (26.1%)     | 13 (54.1%)       |         |
| <b>Maternal age, in years</b>                | Mean (SD)       | 27.8 (6.2)        | 30.0 (7.4)       | 0.0845  |
| <b>Wealth quintile, n (%)<sup>2</sup></b>    | First (Poorest) | 678 (17.7%)       | 5 (20.8%)        | 0.941   |
|                                              | Second          | 687 (17.9%)       | 5 (20.8%)        |         |
|                                              | Middle          | 714 (18.6%)       | 5 (20.8%)        |         |
|                                              | Fourth          | 727 (19.0%)       | 5 (20.8%)        |         |
|                                              | Fifth (Richest) | 728 (19.0%)       | 3 (12.5%)        |         |
| <b>Cooking fuel, n (%)<sup>3</sup></b>       | Biomass         | 3,341 (87.3%)     | 22 (91.6%)       | 0.789   |
|                                              | No Biomass      | 186 (4.8%)        | 1 (4.1%)         |         |
| <b>Water source, n (%)<sup>4</sup></b>       | Piped water     | 37 (0.8%)         | 0                | 0.269   |
|                                              | Well water      | 2,272 (59.4%)     | 19 (79.1%)       |         |
|                                              | Surface water   | 1,226 (32.0%)     | 4 (16.6%)        |         |
| <b>Type of toilet, n (%)<sup>5</sup></b>     | Flush           | 1,475 (38.5%)     | 9 (37.5%)        | 0.864   |
|                                              | Pit             | 2,022 (52.8%)     | 14 (58.3%)       |         |
|                                              | None            | 36 (0.9%)         | 0                |         |

IQR indicates interquartile range.

<sup>1</sup>70 participants with missing illness duration data (69 alive, 1 death)

<sup>2</sup>291 participants with missing wealth quintile data (290 alive, 1 death)

<sup>3</sup>298 participants with missing cooking fuel data (297 alive, 1 death)

<sup>4</sup>290 participants with missing cooking fuel data (289 alive, 1 death)

<sup>5</sup>292 participants with missing cooking fuel data (291 alive, 1 death)



**Supplemental Table 15. Summary Table**

| Model A: exposure variables                                                                                                                                                           | Model B: exposure variables                                                                    | BIC – Model A | BIC – Model B | BIC – absolute difference | Evidence per Raftery scale | Favored Model |
|---------------------------------------------------------------------------------------------------------------------------------------------------------------------------------------|------------------------------------------------------------------------------------------------|---------------|---------------|---------------------------|----------------------------|---------------|
| <ul style="list-style-type: none"> <li>• WHO IMCI referral criteria</li> <li>• SpO<sub>2</sub> &lt;90%</li> <li>• SpO<sub>2</sub> 90-93%</li> <li>• Failed SpO<sub>2</sub></li> </ul> | <b>Model A plus:</b> <ul style="list-style-type: none"> <li>• agemonths</li> </ul>             | -31444.231    | -31438.108    | 6.1                       | Strong                     | Model A       |
| <ul style="list-style-type: none"> <li>• WHO IMCI referral criteria</li> <li>• SpO<sub>2</sub> &lt;90%</li> <li>• SpO<sub>2</sub> 90-93%</li> <li>• Failed SpO<sub>2</sub></li> </ul> | <b>Model A plus:</b> <ul style="list-style-type: none"> <li>• sex</li> </ul>                   | -31444.231    | -31436.671    | 7.5                       | Strong                     | Model A       |
| <ul style="list-style-type: none"> <li>• WHO IMCI referral criteria</li> <li>• SpO<sub>2</sub> &lt;90%</li> <li>• SpO<sub>2</sub> 90-93%</li> <li>• Failed SpO<sub>2</sub></li> </ul> | <b>Model A plus:</b> <ul style="list-style-type: none"> <li>• Duration of illness</li> </ul>   | -31444.231    | -30797.799    | 646.4                     | Very Strong                | Model A       |
| <ul style="list-style-type: none"> <li>• WHO IMCI referral criteria</li> <li>• SpO<sub>2</sub> &lt;90%</li> <li>• SpO<sub>2</sub> 90-93%</li> <li>• Failed SpO<sub>2</sub></li> </ul> | <b>Model A plus:</b> <ul style="list-style-type: none"> <li>• Distance from clinic</li> </ul>  | -31444.231    | -31437.309    | 6.9                       | Strong                     | Model A       |
| <ul style="list-style-type: none"> <li>• WHO IMCI referral criteria</li> <li>• SpO<sub>2</sub> &lt;90%</li> <li>• SpO<sub>2</sub> 90-93%</li> <li>• Failed SpO<sub>2</sub></li> </ul> | <b>Model A plus:</b> <ul style="list-style-type: none"> <li>• Mothers age in years</li> </ul>  | -31444.231    | -28513.890    | 2930.3                    | Very Strong                | Model A       |
| <ul style="list-style-type: none"> <li>• WHO IMCI referral criteria</li> <li>• SpO<sub>2</sub> &lt;90%</li> <li>• SpO<sub>2</sub> 90-93%</li> <li>• Failed SpO<sub>2</sub></li> </ul> | <b>Model A plus:</b> <ul style="list-style-type: none"> <li>• Wealth quintile</li> </ul>       | -31444.231    | -28765.905    | 2678.3                    | Very Strong                | Model A       |
| <ul style="list-style-type: none"> <li>• WHO IMCI referral criteria</li> <li>• SpO<sub>2</sub> &lt;90%</li> <li>• SpO<sub>2</sub> 90-93%</li> <li>• Failed SpO<sub>2</sub></li> </ul> | <b>Model A plus:</b> <ul style="list-style-type: none"> <li>• Cooking fuel</li> </ul>          | -31444.231    | -28701.620    | 2742.6                    | Very Strong                | Model A       |
| <ul style="list-style-type: none"> <li>• WHO IMCI referral criteria</li> <li>• SpO<sub>2</sub> &lt;90%</li> <li>• SpO<sub>2</sub> 90-93%</li> <li>• Failed SpO<sub>2</sub></li> </ul> | <b>Model A plus:</b> <ul style="list-style-type: none"> <li>• Drinking water source</li> </ul> | -31444.231    | -28776.592    | 2667.6                    | Very Strong                | Model A       |
| <ul style="list-style-type: none"> <li>• WHO IMCI referral criteria</li> <li>• SpO<sub>2</sub> &lt;90%</li> <li>• SpO<sub>2</sub> 90-93%</li> <li>• Failed SpO<sub>2</sub></li> </ul> | <b>Model A plus:</b> <ul style="list-style-type: none"> <li>• Toilet</li> </ul>                | -31444.231    | -28756.691    | 2687.5                    | Very Strong                | Model A       |



|            |          |          |        |       |          |          |  |
|------------|----------|----------|--------|-------|----------|----------|--|
| IMCI_refer |          |          |        |       |          |          |  |
| yes        | 3.088078 | 1.488237 | 2.34   | 0.019 | 1.200794 | 7.941595 |  |
| hypoxia    |          |          |        |       |          |          |  |
| 90-93      | 4.297255 | 2.224147 | 2.82   | 0.005 | 1.55823  | 11.85088 |  |
| <90        | 10.25691 | 6.015159 | 3.97   | 0.000 | 3.249602 | 32.37451 |  |
| failed     | 11.39268 | 7.505195 | 3.69   | 0.000 | 3.1324   | 41.43571 |  |
| _cons      | .0030693 | .0009125 | -19.46 | 0.000 | .0017139 | .0054966 |  |

Note: \_cons estimates baseline incidence rate.

**Model B:**

|                                   |               |   |        |
|-----------------------------------|---------------|---|--------|
| Poisson regression                | Number of obs | = | 3,848  |
|                                   | Wald chi2(5)  | = | 50.38  |
|                                   | Prob > chi2   | = | 0.0000 |
| Log pseudolikelihood = -131.85725 | Pseudo R2     | = | 0.0960 |

| death2w    | IRR      | Robust Std. Err. | z      | P> z  | [95% Conf. Interval] |          |
|------------|----------|------------------|--------|-------|----------------------|----------|
| IMCI_refer |          |                  |        |       |                      |          |
| yes        | 3.195236 | 1.547166         | 2.40   | 0.016 | 1.236922             | 8.25398  |
| hypoxia    |          |                  |        |       |                      |          |
| 90-93      | 4.178833 | 2.247738         | 2.66   | 0.008 | 1.456147             | 11.99236 |
| <90        | 10.13321 | 5.947302         | 3.95   | 0.000 | 3.207498             | 32.01308 |
| failed     | 11.20877 | 7.44957          | 3.64   | 0.000 | 3.046723             | 41.23664 |
| sex        | 1.409442 | .588582          | 0.82   | 0.411 | .6217077             | 3.195276 |
| _cons      | .0026267 | .0008145         | -19.16 | 0.000 | .0014304             | .0048235 |

Note: \_cons estimates baseline incidence rate.

Measures of Fit for poisson of death2w

|        | Model A    | Model B    | Difference |
|--------|------------|------------|------------|
| Model: | poisson    | poisson    |            |
| N:     | 3848       | 3848       | 0          |
| BIC:   | -31436.671 | -31444.231 | 7.560      |

Difference of 7.560 in BIC provides strong support for **Model A**.

• **Duration of illness (in days)**

**Model A:**

|                                   |               |   |        |
|-----------------------------------|---------------|---|--------|
| Poisson regression                | Number of obs | = | 3,848  |
|                                   | Wald chi2(4)  | = | 45.28  |
|                                   | Prob > chi2   | = | 0.0000 |
| Log pseudolikelihood = -132.20513 | Pseudo R2     | = | 0.0936 |

| death2w    | IRR      | Robust Std. Err. | z      | P> z  | [95% Conf. Interval] |          |
|------------|----------|------------------|--------|-------|----------------------|----------|
| IMCI_refer |          |                  |        |       |                      |          |
| yes        | 3.088078 | 1.488237         | 2.34   | 0.019 | 1.200794             | 7.941595 |
| hypoxia    |          |                  |        |       |                      |          |
| 90-93      | 4.297255 | 2.224147         | 2.82   | 0.005 | 1.55823              | 11.85088 |
| <90        | 10.25691 | 6.015159         | 3.97   | 0.000 | 3.249602             | 32.37451 |
| failed     | 11.39268 | 7.505195         | 3.69   | 0.000 | 3.1324               | 41.43571 |
| _cons      | .0030693 | .0009125         | -19.46 | 0.000 | .0017139             | .0054966 |

Note: \_cons estimates baseline incidence rate.

**Model B:**

|                    |               |   |        |
|--------------------|---------------|---|--------|
| Poisson regression | Number of obs | = | 3,778  |
|                    | Wald chi2(5)  | = | 42.10  |
|                    | Prob > chi2   | = | 0.0000 |



```

      _cons | .0022019 .0009653 -13.96 0.000 .0009325 .0051994
-----+-----

```

Note: \_cons estimates baseline incidence rate.

Measures of Fit for poisson of death2w

|        | Model B    | Model A    | Difference |
|--------|------------|------------|------------|
| Model: | poisson    | poisson    |            |
| N:     | 3848       | 3848       | 0          |
| BIC:   | -31437.309 | -31444.231 | 6.922      |

Difference of 6.922 in BIC provides strong support for **Model A**.

- **PCV (pneumococcal conjugate vaccine) status**

**Model A:**

```

Poisson regression      Number of obs   =   3,848
                        Wald chi2(4)           =   45.28
                        Prob > chi2            =   0.0000
Log pseudolikelihood = -132.20513          Pseudo R2       =   0.0936

```

```

-----+-----
      death2w |          IRR   Robust
              |          Std. Err.   z   P>|z|   [95% Conf. Interval]
-----+-----
IMCI_refer |
  yes      |   3.088078   1.488237   2.34  0.019   1.200794   7.941595
hypoxia    |
  90-93    |   4.297255   2.224147   2.82  0.005   1.55823   11.85088
  <90      |  10.25691    6.015159   3.97  0.000   3.249602  32.37451
  failed   |  11.39268    7.505195   3.69  0.000   3.1324    41.43571
  _cons    |   .0030693   .0009125  -19.46  0.000   .0017139   .0054966
-----+-----

```

Note: \_cons estimates baseline incidence rate.

**Model B:**

```

Poisson regression      Number of obs   =   3,848
                        Wald chi2(6)           =   60.70
                        Prob > chi2            =   0.0000
Log pseudolikelihood = -128.17505          Pseudo R2       =   0.1212

```

```

-----+-----
      death2w |          IRR   Robust
              |          Std. Err.   z   P>|z|   [95% Conf. Interval]
-----+-----
IMCI_refer |
  yes      |   3.103873   1.473752   2.39  0.017   1.223896   7.871608
hypoxia    |
  90-93    |   4.338794   2.252709   2.83  0.005   1.568281  12.00368
  <90      |  11.94653    7.113074   4.17  0.000   3.719022  38.37559
  failed   |   8.65485    5.661911   3.30  0.001   2.401113  31.19655
  PCV      |
  >=1      |   1.103826   1.191732   0.09  0.927   .1330184   9.159875
  miss     |   3.627252   3.864158   1.21  0.226   .4495539  29.26669
  _cons    |   .0017436   .0018988  -5.83  0.000   .0002063   .0147371
-----+-----

```

Note: \_cons estimates baseline incidence rate.

|        | Model B    | Model A    | Difference |
|--------|------------|------------|------------|
| Model: | poisson    | poisson    |            |
| N:     | 3848       | 3848       | 0          |
| BIC:   | -31427.525 | -31444.231 | 16.706     |

Difference of 16.706 in BIC provides **very strong support** for **Model A**.





| death2w    | IRR      | Robust Std. Err. | z     | P> z  | [95% Conf. Interval] |          |
|------------|----------|------------------|-------|-------|----------------------|----------|
| IMCI_refer |          |                  |       |       |                      |          |
| yes        | 3.33858  | 1.591857         | 2.53  | 0.011 | 1.311303             | 8.500029 |
| hypoxia    |          |                  |       |       |                      |          |
| 90-93      | 4.32805  | 2.23504          | 2.84  | 0.005 | 1.572986             | 11.90857 |
| <90        | 7.759166 | 5.074746         | 3.13  | 0.002 | 2.153285             | 27.95944 |
| failed     | 11.92115 | 7.77758          | 3.80  | 0.000 | 3.318777             | 42.82111 |
| cook       | 1.096524 | 1.128305         | 0.09  | 0.929 | .1459303             | 8.2393   |
| _cons      | .002981  | .003186          | -5.44 | 0.000 | .000367              | .0242163 |

Note: \_cons estimates baseline incidence rate.

Measures of Fit for poisson of death2w

|        | Model B    | Model A    | Difference |
|--------|------------|------------|------------|
| Model: | poisson    | poisson    |            |
| N:     | 3550       | 3848       | -298       |
| BIC:   | -28701.620 | -31444.231 | 2742.611   |

Difference of 2742.611 in BIC provides strong support for Model A.

- **Water source**

**Model A:**

|                                   |               |   |        |
|-----------------------------------|---------------|---|--------|
| Poisson regression                | Number of obs | = | 3,848  |
|                                   | Wald chi2(4)  | = | 45.28  |
|                                   | Prob > chi2   | = | 0.0000 |
| Log pseudolikelihood = -132.20513 | Pseudo R2     | = | 0.0936 |

| death2w    | IRR      | Robust Std. Err. | z      | P> z  | [95% Conf. Interval] |          |
|------------|----------|------------------|--------|-------|----------------------|----------|
| IMCI_refer |          |                  |        |       |                      |          |
| yes        | 3.088078 | 1.488237         | 2.34   | 0.019 | 1.200794             | 7.941595 |
| hypoxia    |          |                  |        |       |                      |          |
| 90-93      | 4.297255 | 2.224147         | 2.82   | 0.005 | 1.55823              | 11.85088 |
| <90        | 10.25691 | 6.015159         | 3.97   | 0.000 | 3.249602             | 32.37451 |
| failed     | 11.39268 | 7.505195         | 3.69   | 0.000 | 3.1324               | 41.43571 |
| _cons      | .0030693 | .0009125         | -19.46 | 0.000 | .0017139             | .0054966 |

Note: \_cons estimates baseline incidence rate.

**Model B:**

|                                   |               |   |        |
|-----------------------------------|---------------|---|--------|
| Poisson regression                | Number of obs | = | 3,558  |
|                                   | Wald chi2(5)  | = | 39.50  |
|                                   | Prob > chi2   | = | 0.0000 |
| Log pseudolikelihood = -125.79688 | Pseudo R2     | = | 0.0947 |

| death2w    | IRR      | Robust Std. Err. | z     | P> z  | [95% Conf. Interval] |          |
|------------|----------|------------------|-------|-------|----------------------|----------|
| IMCI_refer |          |                  |       |       |                      |          |
| yes        | 3.420568 | 1.648687         | 2.55  | 0.011 | 1.329921             | 8.79773  |
| hypoxia    |          |                  |       |       |                      |          |
| 90-93      | 3.988581 | 2.099558         | 2.63  | 0.009 | 1.421519             | 11.1914  |
| <90        | 7.26988  | 4.774762         | 3.02  | 0.003 | 2.006639             | 26.33815 |
| failed     | 11.34992 | 7.435438         | 3.71  | 0.000 | 3.143133             | 40.9848  |
| water      | .5385543 | .236354          | -1.41 | 0.158 | .2278582             | 1.2729   |
| _cons      | .0071539 | .0043359         | -8.15 | 0.000 | .0021809             | .0234666 |





◇ Exploratory post-hoc sensitivity analysis – Weekly community surveillance for acute respiratory illness

• Supplemental Table 16. Hypoxemia strata

| SpO <sub>2</sub> range, n (%) | No weekly surveillance,<br>N=3,340 | Weekly surveillance,<br>N=508 | p value |
|-------------------------------|------------------------------------|-------------------------------|---------|
| 94-100%                       | 2,932 (87.7%)                      | 441 (86.8%)                   | 0.730   |
| 90-93%                        | 261 (7.8%)                         | 45 (8.8%)                     |         |
| <90%                          | 87 (2.6%)                          | 15 (2.9%)                     |         |
| Failed measurement            | 60 (1.8%)                          | 7 (1.3%)                      |         |

• Supplemental Table 17. Mortality

| Mortality, n (%) | No weekly surveillance,<br>N=3,340 | Weekly surveillance,<br>N=508 | p value |
|------------------|------------------------------------|-------------------------------|---------|
| Alive            | 3,317 (99.3%)                      | 507 (99.8%)                   | 0.190   |
| Dead             | 23 (0.7%)                          | 1 (0.2%)                      |         |

• Primary Model controlling for weekly surveillance (Stata output)

```
Poisson regression                               Number of obs   =    3,848
                                                  Wald chi2(5)    =    48.46
                                                  Prob > chi2     =    0.0000
Log pseudolikelihood = -130.91839              Pseudo R2      =    0.1024
```

```
-----+-----
```

| death2w                   | IRR      | Robust<br>Std. Err. | z      | P> z  | [95% Conf. Interval] |          |
|---------------------------|----------|---------------------|--------|-------|----------------------|----------|
| IMCI_refer<br>yes         | 3.201104 | 1.506542            | 2.47   | 0.013 | 1.272615             | 8.051975 |
| SpO <sub>2</sub><br>90-93 | 4.280017 | 2.208068            | 2.82   | 0.005 | 1.557074             | 11.76473 |
| <90                       | 10.50013 | 6.142024            | 4.02   | 0.000 | 3.336463             | 33.04478 |
| failed                    | 11.29997 | 7.392041            | 3.71   | 0.000 | 3.135101             | 40.72895 |
| Weekly<br>yes Weekly      | .2656409 | .2692679            | -1.31  | 0.191 | .036431              | 1.936951 |
| _cons                     | .0033847 | .0010095            | -19.07 | 0.000 | .0018865             | .0060729 |

```
-----+-----
```

Note: \_cons estimates baseline incidence rate.

• Model selection accounting for weekly surveillance (Stata output)

Model A.

```
Poisson regression                               Number of obs   =    3,848
                                                  Wald chi2(4)    =    45.28
                                                  Prob > chi2     =    0.0000
Log pseudolikelihood = -132.20513              Pseudo R2      =    0.0936
```

```
-----+-----
```

| death2w                   | IRR      | Robust<br>Std. Err. | z      | P> z  | [95% Conf. Interval] |          |
|---------------------------|----------|---------------------|--------|-------|----------------------|----------|
| IMCI_refer<br>yes         | 3.088078 | 1.488237            | 2.34   | 0.019 | 1.200794             | 7.941595 |
| SpO <sub>2</sub><br>90-93 | 4.297255 | 2.224147            | 2.82   | 0.005 | 1.55823              | 11.85088 |
| <90                       | 10.25691 | 6.015159            | 3.97   | 0.000 | 3.249602             | 32.37451 |
| failed                    | 11.39268 | 7.505195            | 3.69   | 0.000 | 3.1324               | 41.43571 |
| _cons                     | .0030693 | .0009125            | -19.46 | 0.000 | .0017139             | .0054966 |

```
-----+-----
```

Note: \_cons estimates baseline incidence rate.

Model B.



◇ **Exploratory post-hoc sensitivity analysis – One month mortality**

24 of the 33 deaths (73%) that took place by four-weeks had already occurred by the two-week mark. To evaluate whether using a four-week endpoint meaningfully changed our findings we conducted a post-hoc analysis of our primary model using a four-week outcome period. As is seen below there are no qualitative changes in our findings based on this sensitivity analysis.

```
Poisson regression                                Number of obs   =    3,846
                                                    Wald chi2(4)    =    41.97
                                                    Prob > chi2     =    0.0000
Log pseudolikelihood = -177.01457                Pseudo R2      =    0.0685
```

| death1m          | IRR      | Robust<br>Std. Err. | z      | P> z  | [95% Conf. Interval] |          |
|------------------|----------|---------------------|--------|-------|----------------------|----------|
| IMCI refer       |          |                     |        |       |                      |          |
| yes              | 3.091602 | 1.281484            | 2.72   | 0.006 | 1.372008             | 6.966435 |
| SpO <sub>2</sub> |          |                     |        |       |                      |          |
| 90-93            | 3.797379 | 1.649481            | 3.07   | 0.002 | 1.620856             | 8.896584 |
| <90              | 6.474083 | 3.604245            | 3.36   | 0.001 | 2.174193             | 19.27784 |
| failed           | 7.190706 | 4.537666            | 3.13   | 0.002 | 2.087489             | 24.76959 |
| _cons            | .0048611 | .0011449            | -22.62 | 0.000 | .0030638             | .0077128 |

Note: \_cons estimates baseline incidence rate.

## ◇ Exploratory post-hoc sensitivity analysis – Verbal autopsy data

Surveillance activities include verbal autopsies on deceased individuals conducted by trained CHWs using a standardized form adapted from the WHO. Post-hoc sensitivity analyses of verbal autopsy data were performed using two approaches, (1) a “symptom coding” approach aligned with IMCI and (2) a computer coded verbal autopsy (CCVA) approach using with WHO’s OpenVA platform (<https://openva.net/>).

### **IMCI symptom coding:**

In the symptom coding VA analysis approach, we created a binary variable for probable LRI using two closed-ended questions from the WHO VA tool, (1) “Did baby/child have any difficulty with breathing?” and (2) “Did baby/child have cough?” We then classified a child with cough and/or difficult breathing and either fast breathing, chest indrawing, grunting, or wheezing as a probable LRI death.

### **2 week mortality:**

Using this approach, VA data indicates that at our primary 2 week outcome, 21/24 deaths were probable LRI (87%). We re-analyzed our primary model dropping the 3 non probable LRI deaths at two weeks from our analysis (1 death occurred in the SpO<sub>2</sub> 94-100% range, 1 death in <90%, and 1 death in failed SpO<sub>2</sub> measurement). There are no qualitative changes in our findings based on this sensitivity analysis.

### **Supplemental Table 18. IMCI symptom VA results by probable LRI and SpO<sub>2</sub> strata among 3-11 month olds – 2 week mortality**

| Hypoxemia, n (%)                    | IMCI symptom VA – No LRI, N=3 | IMCI symptom VA – LRI, N=21 |
|-------------------------------------|-------------------------------|-----------------------------|
| SpO <sub>2</sub> 94-100%            | 1 (8%)                        | 11 (91%)                    |
| SpO <sub>2</sub> 90-93%             | 0                             | 5 (100%)                    |
| SpO <sub>2</sub> <90%               | 1 (25%)                       | 3 (75%)                     |
| Failed SpO <sub>2</sub> measurement | 1 (33%)                       | 2 (66%)                     |

### **Statistical Output (Stata). Risk of two-week LRI mortality by IMCI symptom VA results among 3-11 month olds**

```
Poisson regression                                Number of obs   =   3,845
                                                    Wald chi2(4)    =   35.95
                                                    Prob > chi2     =   0.0000
Log pseudolikelihood = -119.10737                Pseudo R2      =   0.0867
```

| death14          | IRR      | Robust Std. Err. | z      | P> z  | [95% Conf. Interval] |
|------------------|----------|------------------|--------|-------|----------------------|
| IMCI refer       |          |                  |        |       |                      |
| yes              | 3.766143 | 1.850566         | 2.70   | 0.007 | 1.437615 9.866223    |
| SpO <sub>2</sub> |          |                  |        |       |                      |
| 90-93            | 4.607234 | 2.415904         | 2.91   | 0.004 | 1.648519 12.87616    |
| <90              | 8.297839 | 5.516088         | 3.18   | 0.001 | 2.254855 30.53595    |
| failed           | 8.167038 | 6.428539         | 2.67   | 0.008 | 1.746049 38.20083    |
| _cons            | .0026942 | .0008531         | -18.69 | 0.000 | .0014484 .0050113    |

Note: \_cons estimates baseline incidence rate.

### **1 month mortality:**

At 1 month, 29/33 (87%) deaths were “probable LRI” using the IMCI symptom coding approach. We re-analyzed our primary model dropping the 4 non probable LRI deaths at 3 months from our analysis (2 deaths occurred in the SpO<sub>2</sub> 94-100% range, 0 deaths 90-93% range, 1 death in <90%, and 1 death in failed SpO<sub>2</sub> measurement). We found no qualitative changes in our findings with this sensitivity analysis.

### **Supplemental Table 19. WHO IMCI symptom VA results by probable LRI and SpO<sub>2</sub> strata among 3-11 month olds – 1 month mortality**

| Hypoxemia, n (%)                    | WHO IMCI symptom VA – No LRI, N=4 | WHO IMCI symptom VA – LRI, N=29 |
|-------------------------------------|-----------------------------------|---------------------------------|
| SpO <sub>2</sub> 94-100%            | 2 (10%)                           | 17 (89%)                        |
| SpO <sub>2</sub> 90-93%             | 0                                 | 7 (100%)                        |
| SpO <sub>2</sub> <90%               | 1 (25%)                           | 3 (75%)                         |
| Failed SpO <sub>2</sub> measurement | 1 (33%)                           | 2 (66%)                         |



**2 week mortality:**

We re-analyzed our primary model dropping the 3 non probable LRI deaths at two weeks from our analysis (1 non LRI death occurred in the SpO<sub>2</sub> 94-100% range, 1 death in the 90-93% range, 0 deaths in <90%, and 1 death in failed SpO<sub>2</sub> measurement). There are no qualitative changes in our findings based on this sensitivity analysis.

**Supplemental Table 21. CCVA results by probable LRI and SpO<sub>2</sub> strata among 3-11 month olds – 2 week mortality**

| Hypoxemia, n (%)                    | CCVA – No LRI, N=3 | CCVA – LRI, N=20 |
|-------------------------------------|--------------------|------------------|
| SpO <sub>2</sub> 94-100%            | 1 (9%)             | 10 (90%)         |
| SpO <sub>2</sub> 90-93%             | 1 (20%)            | 4 (80%)          |
| SpO <sub>2</sub> <90%               | 0                  | 4 (100%)         |
| Failed SpO <sub>2</sub> measurement | 1 (33%)            | 2 (66%)          |

**Statistical Output (Stata). Risk of two-week LRI mortality by CCVA results among 3-11 month olds**

```
Poisson regression                                Number of obs   =    3,838
                                                    Wald chi2(4)    =    44.90
                                                    Prob > chi2     =    0.0000
Log pseudolikelihood = -118.12924                Pseudo R2      =    0.0939
```

| death2w           | IRR      | Robust Std. Err. | z      | P> z  | [95% Conf. Interval] |          |
|-------------------|----------|------------------|--------|-------|----------------------|----------|
| IMCI_refer<br>yes | 3.837677 | 1.884962         | 2.74   | 0.006 | 1.465485             | 10.04975 |
| hypoxia<br>90-93  | 3.727059 | 2.097485         | 2.34   | 0.019 | 1.236898             | 11.23049 |
| <90               | 10.94352 | 6.547705         | 4.00   | 0.000 | 3.387411             | 35.35463 |
| failed            | 8.488399 | 6.63871          | 2.73   | 0.006 | 1.832769             | 39.31369 |
| _cons             | .0026866 | .0008533         | -18.64 | 0.000 | .0014416             | .0050066 |

Note: \_cons estimates baseline incidence rate.

**1 month mortality:**

We re-analyzed our primary model dropping the 3 non probable LRI deaths at 1 month from our analysis (2 non LRI deaths occurred in the SpO<sub>2</sub> 94-100% range, 2 deaths in the 90-93% range, 0 deaths in <90%, and 1 death in failed SpO<sub>2</sub> measurement). There are no qualitative changes in our findings based on this sensitivity analysis.

**Supplemental Table 22. CCVA results by probable LRI and SpO<sub>2</sub> strata among 3-11 month olds – 1 month mortality**

| Hypoxemia, n (%)                    | CCVA – No LRI, N=5 | CCVA – LRI, N=27 |
|-------------------------------------|--------------------|------------------|
| SpO <sub>2</sub> 94-100%            | 2 (11%)            | 16 (88%)         |
| SpO <sub>2</sub> 90-93%             | 2 (28%)            | 5 (71%)          |
| SpO <sub>2</sub> <90%               | 0                  | 4 (100%)         |
| Failed SpO <sub>2</sub> measurement | 1 (33%)            | 2 (84%)          |

**Statistical Output (Stata). Risk of 1 month LRI mortality by CCVA results among 3-11 month olds**

```
Poisson regression                                Number of obs   =    3,836
                                                    Wald chi2(4)    =    41.41
                                                    Prob > chi2     =    0.0000
Log pseudolikelihood = -154.03109                Pseudo R2      =    0.0708
```

| Death1m           | IRR      | Robust Std. Err. | z    | P> z  | [95% Conf. Interval] |          |
|-------------------|----------|------------------|------|-------|----------------------|----------|
| IMCI_refer<br>yes | 3.999751 | 1.701045         | 3.26 | 0.001 | 1.737911             | 9.205311 |

|         |          |          |        |       |          |          |  |
|---------|----------|----------|--------|-------|----------|----------|--|
| hypoxia |          |          |        |       |          |          |  |
| 90-93   | 3.002195 | 1.485697 | 2.22   | 0.026 | 1.138163 | 7.919053 |  |
| <90     | 7.048637 | 4.005814 | 3.44   | 0.001 | 2.313974 | 21.47098 |  |
| failed  | 5.464678 | 4.148496 | 2.24   | 0.025 | 1.234176 | 24.19647 |  |
| _cons   | .0041123 | .001054  | -21.44 | 0.000 | .0024884 | .0067958 |  |

Note: \_cons estimates baseline incidence rate.

### 3 month mortality:

We re-analyzed our primary model dropping the 3 non probable LRI deaths at 3 months from our analysis (5 non LRI deaths occurred in the SpO<sub>2</sub> 94-100% range, 3 deaths in the 90-93% range, 0 deaths in <90%, and 1 death in failed SpO<sub>2</sub> measurement). There are no qualitative changes in our findings based on this sensitivity analysis.

### Supplemental Table 23. CCVA results by probable LRI and SpO<sub>2</sub> strata among 3-11 month olds – 3 month mortality

| Hypoxemia, n (%)                    | CCVA – No LRI, N=9 | CCVA – LRI, N=36 |
|-------------------------------------|--------------------|------------------|
| SpO <sub>2</sub> 94-100%            | 5 (18%)            | 22 (81%)         |
| SpO <sub>2</sub> 90-93%             | 3 (33%)            | 6 (66%)          |
| SpO <sub>2</sub> <90%               | 0                  | 4 (100%)         |
| Failed SpO <sub>2</sub> measurement | 1 (20%)            | 4 (80%)          |

### Statistical Output (Stata). Risk of 3 month LRI mortality by CCVA results among 3-11 month olds

|                                   |               |   |        |
|-----------------------------------|---------------|---|--------|
| Poisson regression                | Number of obs | = | 3,827  |
|                                   | Wald chi2(4)  | = | 44.22  |
|                                   | Prob > chi2   | = | 0.0000 |
| Log pseudolikelihood = -194.85037 | Pseudo R2     | = | 0.0661 |

| Death3m    | IRR      | Robust Std. Err. | z      | P> z  | [95% Conf. Interval] |
|------------|----------|------------------|--------|-------|----------------------|
| IMCI_refer |          |                  |        |       |                      |
| yes        | 4.305268 | 1.55199          | 4.05   | 0.000 | 2.123996 8.726633    |
| hypoxia    |          |                  |        |       |                      |
| 90-93      | 2.536414 | 1.13168          | 2.09   | 0.037 | 1.057881 6.0814      |
| <90        | 4.946178 | 2.724373         | 2.90   | 0.004 | 1.680447 14.55843    |
| failed     | 5.747006 | 3.435861         | 2.92   | 0.003 | 1.780528 18.5496     |
| _cons      | .0057086 | .0012562         | -23.48 | 0.000 | .0037087 .008787     |

Note: \_cons estimates baseline incidence rate.
